# Supplementary material for: N 2 O emissions from the global agricultural nitrogen cycle – current state and future scenarios
Source: Copernicus journal article supplement (doi:10.5194/bg-9-4169-2012), 2012-10-31
Supplement: Supplementary file 1 [file supplementary_model_outputs.xls]

## Sheet: World
WORLD		1995	2045	2045	2045	2045	2095	2095	2095	2095
			A1	A2	B1	B2	A1	A2	B1	B2
Population and GDP
Population	Million capita	5677.64	8615.88	10772.2	8615.88	9169.89	7357.73	14793.7	7357.73	10354.5
GDP per capita	US$05 per capita	6003.24	25787.4	9854.16	19735	15025.4	91593.4	21227.7	61506.9	30846.5
Food demand
Food demand (after processing)	EJ	22.7915	45.552	50.2394	42.2823	43.3855	47.4129	81.1698	41.019	53.2643
Livestock demand (after processing)	EJ	3.59739	10.8339	8.75609	9.42311	9.385	10.4772	14.1361	6.5057	9.84197
Livestock product share	share	0.157839	0.237836	0.174287	0.222862	0.216316	0.220979	0.174155	0.158602	0.184776
Food demand	kcal per capita per day	2628.58	3461.97	3053.92	3213.47	3098.11	4219.57	3592.8	3650.54	3368.4
Animal product demand	kcal per capita per day	414.892	823.382	532.259	716.16	670.171	932.435	625.703	578.983	622.4
Cropland area and yields
Cropland Area	Million ha	1441.48	1904.57	1843.41	1718.71	1685.77	1787.16	2072.86	1288.06	1691.82
Average yield	t DM / ha	2.42608	6.56144	4.46214	6.70743	4.45249	7.54709	6.47711	8.55892	5.14717
Average yield	kg Nr / ha	43.908	95.723	82.8656	93.1148	85.0304	109.733	125.242	106.494	100.088
Harvested Crops
Crop demand	Tg DM	3497.15	12496.7	8225.58	11528.1	7505.88	13487.8	13426.2	11024.4	8708.09
- Food	Tg DM	1747.95	3133.2	3763.25	2986.13	3046.93	3365.72	6133.6	3170.06	3907.68
- Feed	Tg DM	1330.85	4596.09	3445.48	3827.72	3555.58	4871.6	5962.67	2749.58	3943.14
- Seed	Tg DM	99.5825	255.225	213.253	239.421	190.629	278.713	341.299	235.105	230.274
- Material and waste	Tg DM	276.269	544.467	604.195	504.531	513.345	577.078	988.589	497.671	626.998
- Bioenergy	Tg DM	42.5	3967.73	199.4	3970.34	199.4	4394.73	0	4371.95	0
Crop production	Tg DM	3497.15	12496.7	8225.58	11528.1	7505.88	13487.8	13426.2	11024.4	8708.09
Crop Net-Exports	Tg DM	0	-4.54747e-11	0	0	0	0	0	0	0
Crop demand	Tg Nr	63.2926	182.311	152.756	160.037	143.342	196.11	259.61	137.17	169.332
- Food	Tg Nr	30.5623	53.5353	64.3336	51.3411	51.9112	57.9077	105.219	55.1024	66.1486
- Feed	Tg Nr	25.22	105.122	71.9305	86.278	76.981	112.567	128.272	59.1175	86.4677
- Seed	Tg Nr	2.00253	5.24658	4.60826	4.79721	4.34456	5.84455	7.49163	4.33426	5.19164
- Material and waste	Tg Nr	5.40584	10.2635	11.4048	9.51045	9.62661	10.8279	18.627	9.36601	11.5239
- Bioenergy	Tg Nr	0.102	8.14342	0.47856	8.11059	0.47856	8.96324	0	9.25023	0
Crop production	Tg Nr	63.2926	182.311	152.756	160.037	143.342	196.11	259.61	137.17	169.332
Crop Net-Exports	Tg Nr	0	0	0	0	0	0	0	0	0
Livestock Sector
Total livestock demand	Tg DM	177.89	523.016	431.459	449.118	440.566	509.081	691.208	309.888	458.857
- Food	Tg DM	148.448	454.792	370.387	390.788	383.034	445.916	593.871	265.07	399.913
Livestock production	Tg DM	177.89	523.016	431.459	449.118	440.566	509.081	691.208	309.888	458.857
Livestock Net-Exports	Tg DM	0	0	0	0	0	0	0	0	0
Fooduse livestock demand	Tg Nr	7.64018	23.4441	19.0985	20.0381	19.7445	22.9286	30.6594	13.5475	20.4925
Total livestock demand	Tg Nr	9.05774	26.7019	22.0347	22.8265	22.5009	25.9515	35.3443	15.7024	23.3217
Livestock production	Tg Nr	9.05774	26.7019	22.0347	22.8265	22.5009	25.9515	35.3443	15.7024	23.3217
Livestock Net-Exports	Tg Nr	0	0	0	9.9476e-14	0	0	0	0	0
Total Feed	Tg Nr	122.665	275.835	281.731	246.497	291.358	238.571	378.642	151.116	269.942
Slaughtered Animals	Tg Nr	11.7709	34.8734	31.8158	29.5752	29.3879	33.8508	46.2416	20.2857	30.2599
Manure	Tg Nr	110.894	240.962	249.916	216.922	261.971	204.72	332.4	130.83	239.682
Manure in confinement	Tg Nr	42.8692	138.435	110.676	120.147	108.787	155.97	196.014	99.2079	131.462
- applied to cropland	Tg Nr	23.9232	88.8662	62.9447	68.645	58.7594	102.94	116.002	54.9608	68.2197
- applied to pasture	Tg Nr	2.24335	34.1342	14.4145	26.1168	12.913	53.0298	44.0183	28.3132	25.456
- lost	Tg Nr	16.7027	15.4343	33.3172	25.3855	37.1147	0	35.9939	15.9339	37.7864
Manure on pasture	Tg Nr	68.0246	102.527	139.239	96.7751	153.184	48.7502	136.386	31.6225	108.22
- collected for fuel	Tg Nr	12.0391	3.76246	14.5113	12.0391	12.0708	0	5.91762	0	6.44827
feed per animal product	kg Nr / t DM	0.689552	0.527393	0.652974	0.548847	0.661328	0.468631	0.547797	0.487647	0.588292
manure per animal product	kg Nr / t DM	0.623384	0.460715	0.579234	0.482996	0.594624	0.402137	0.480898	0.422186	0.522346
Crop Residues
Crop Residues	Tg DM	4004.38	9922.84	8428.44	8901.99	7624.95	10290.8	13185.4	7828.91	8740.53
- used for feed	Tg DM	1159.34	3089.18	2830.4	2866.85	2760.09	3842.94	4923.9	2780.31	3513.16
- recycled to soils	Tg DM	1899.95	5373.26	4044.21	4723.06	3452.54	5178.93	6303.78	4082.12	3925.14
- other uses	Tg DM	945.096	1460.4	1553.82	1312.08	1412.32	1268.92	1957.75	966.476	1302.23
BG Crop Residues	Tg DM	1676.6	7884.83	3697.21	7413.63	3400.51	8742.64	6019.47	7446.17	3950.47
AG Crop Residues	Tg Nr	34.5444	93.5267	73.2097	84.6131	66.7354	98.255	114.296	75.9669	76.094
- used for feed	Tg Nr	11.2348	30.0333	27.2278	27.7064	26.7209	36.6096	46.6166	26.2187	33.7854
- recycled to soils	Tg Nr	15.272	49.8007	32.5516	44.4984	27.6824	49.6033	50.7701	40.4329	31.0105
- other uses	Tg Nr	8.03754	13.6927	13.4303	12.4083	12.3321	12.042	16.9088	9.31531	11.2981
BG Crop Residues	Tg Nr	16.6863	47.0384	36.5279	42.3214	33.7232	50.679	59.7286	38.0157	39.1886
Conversion Byproducts
Conversion Byproduct Demand	Tg DM	319.5	478.923	644.096	473.252	518.134	522.082	893.912	531.911	647.46
- used as feed	Tg DM	256.23	415.653	580.826	409.982	454.864	458.812	830.642	468.641	584.19
Conversion Byproduct Production	Tg DM	319.5	543.091	644.18	524.406	523.388	591.217	1064.73	560.914	649.021
Conversion Byproduct Net-Exports	Tg DM	1.42109e-14	64.1687	0.0832509	51.154	5.25404	69.1348	170.821	29.0029	1.5605
Conversion Byproduct Demand	Tg Nr	14.9474	25.2231	29.6993	24.5653	24.2898	27.9784	49.4338	26.7492	29.9898
- used as feed	Tg Nr	13.4411	23.7168	28.193	23.059	22.7835	26.4721	47.9275	25.2429	28.4835
Conversion Byproduct Production	Tg Nr	14.9474	25.2231	29.6993	24.5653	24.2898	27.9784	49.4338	26.7492	29.9898
Conversion Byproduct Net-Exports	Tg Nr	1.44329e-15	-1.55431e-15	-1.77636e-15	-1.66533e-15	-3.88578e-15	-1.95399e-14	2.88658e-15	-6.66134e-16	-2.22045e-16
Other Nr inputs
Nr fixation crops	Tg Nr	20.0187	70.1959	52.9849	58.6027	53.5612	75.5825	94.2677	44.8487	62.0129
Nr fixation cropland area	Tg Nr	9.83466	11.1417	11.8756	10.0759	10.2966	9.77411	13.1781	7.56886	10.5257
Nr deposition on cropland	Tg Nr	14.7236	32.4678	33.0906	28.4029	31.182	32.8686	44.5939	20.0442	30.1495
Soil organic matter loss	Tg Nr	25.0268	9.80169	18.2478	4.85521	2.18376	0.350264	9.28863	0.23052	0.53414
Inorganic Fertilizer	Tg Nr	77.59	173.273	177.307	145.158	122.165	214.063	259.563	128.131	130.957
Cropland Soil Budgets
Total Nr withdrawals	Tg Nr	114.523	322.876	262.493	286.972	243.801	345.044	433.634	251.153	284.614
Total Nr inputs	Tg Nr	205.078	487.832	430.139	407.357	343.898	541.705	654.883	338.567	377.79
Nr uptake efficiency (NUpE)	share	0.558438	0.661859	0.610252	0.704473	0.708933	0.636959	0.662154	0.741812	0.753367
Crop uptake from soils	Tg Nr	92.5021	247.434	204.9	223.572	185.895	263.617	331.874	201.97	217.41
inputs to cropland soils	Tg Nr	183.057	412.389	372.546	343.957	285.992	460.278	553.124	289.384	310.586
Soil Nr uptake efficiency (SNUpE)	share	0.505319	0.6	0.55	0.65	0.65	0.572734	0.6	0.697931	0.7
Losses	Tg Nr	90.5546	164.956	167.646	120.385	100.097	196.661	221.25	87.414	93.1757
Nitrogen use efficiency (NUE)	kg Nr / tDM	58.6414	39.0368	52.2928	35.3359	45.8171	40.1625	48.7767	30.7108	43.3838
inorganic fertilizer per harvest	kg Nr / tDM	22.1866	13.8655	21.5556	12.5916	16.2758	15.8708	19.3326	11.6225	15.0386
manure per t harvest	kg Nr / tDM	6.84078	7.11117	7.65232	5.95456	7.82844	7.63207	8.63999	4.9854	7.83406
biologic fixation per t harvest	kg Nr / tDM	8.53649	6.50872	7.88522	5.95747	8.50771	6.32842	8.00272	4.7547	8.33002
manure per mineral fertilizer	ratio	0.308329	0.512869	0.355003	0.472898	0.480986	0.480888	0.446913	0.428942	0.52093
biological fixation per mineral fertilizer	ratio	0.384758	0.46942	0.365808	0.473129	0.52272	0.398746	0.413949	0.409093	0.55391
harvested N per capita	kg Nr / capita	11.1477	21.1599	14.1806	18.5747	15.6318	26.6536	17.5486	18.643	16.3535
fertilizer N per capita	kg Nr / capita	13.6659	20.1109	16.4598	16.8478	13.3224	29.0936	17.5455	17.4145	12.6474
harvested N per food demand	Tg Nr / EJ	2.77702	4.00226	3.04056	3.78498	3.30391	4.13621	3.19835	3.34407	3.17909
fertilizer N per food demand	Tg Nr / EJ	3.40433	3.80384	3.52925	3.43307	2.81579	4.51486	3.19778	3.1237	2.45863
Nr withdrawals per ha	kg / ha	79.4484	169.527	142.395	166.969	144.622	193.069	209.196	194.986	168.23
Nr inputs per ha	kg / ha	142.269	256.138	233.338	237.013	204	303.11	315.932	262.851	223.304
Emissions
N2O emissions	Tg N2O-N	3.92843	8.10277	8.58708	7.16606	7.51507	7.21115	11.5823	4.89571	7.20862
N2O per capita	kg N2O-N / capita	0.691913	0.940447	0.797155	0.831727	0.819538	0.980078	0.782921	0.665384	0.696185
N2O per food energy	kg N2O-N / EJ	0.172363	0.17788	0.170923	0.169481	0.173216	0.152092	0.142692	0.119352	0.135337

## Sheet: AFR
AFR		1995	2045				2095
			A1	A2	B1	B2	A1	A2	B1	B2
Population and GDP
Population	Million capita	589.037	1086.99	1127.86	1086.99	1142.03	1458	1665.69	1458	1712.3
GDP per capita	US$05 per capita	846.217	1908.29	1290.79	2062.99	1135.23	10104.8	2757.24	8565.71	3790.8
Food demand
Food demand (after processing)	EJ	1.89571	4.00926	4.00053	3.96849	3.94785	6.64958	6.68496	6.24227	6.8156
Livestock demand (after processing)	EJ	0.143301	0.647463	0.473015	0.652393	0.498255	1.30777	1.00867	1.18445	1.14366
Livestock product share	share	0.0755923	0.161492	0.118238	0.164393	0.126209	0.196669	0.150887	0.189747	0.1678
Food demand	kcal per capita per day	2107.38	2415.2	2322.62	2390.64	2263.6	2986.44	2627.97	2803.51	2606.4
Animal product demand	kcal per capita per day	159.302	390.036	274.622	393.005	285.688	587.341	396.526	531.958	437.354
Cropland area and yields
Cropland Area	Million ha	196.27	314.834	314.593	288.367	288.382	312.831	316.826	161.083	290.97
Average yield	t DM / ha	0.921847	4.49748	2.39788	4.69077	2.5817	5.43858	4.52576	7.16758	3.97152
Average yield	kg Nr / ha	13.3415	49.2137	37.8672	49.0758	40.9279	64.6194	76.2485	56.3808	63.9717
Harvested Crops
Crop demand	Tg DM	195.514	1804.67	895.592	1731.64	971.61	3529.9	1552.25	2026.88	1679.08
- Food	Tg DM	139.826	439.607	463.48	411.513	462.041	538.383	674.14	474.973	716.912
- Feed	Tg DM	27.8946	661.887	336.202	623.068	412.587	2161.77	733.854	745.673	805.68
- Seed	Tg DM	3.78728	16.2403	12.5873	15.4196	13.0329	18.8942	17.643	13.4276	19.0811
- Material and waste	Tg DM	24.0064	82.7761	83.3233	78.4486	83.9488	106.868	126.616	93.5551	137.407
- Bioenergy	Tg DM	0	604.16	0	603.186	0	703.988	0	699.25	0
Crop production	Tg DM	180.931	1415.96	754.358	1352.66	744.517	1701.35	1433.88	1154.58	1155.59
Crop Net-Exports	Tg DM	-14.5834	-388.711	-141.234	-378.974	-227.093	-1828.55	-118.375	-872.303	-523.489
Crop demand	Tg Nr	2.8981	23.3493	15.1253	22.1957	17.2563	58.9703	26.2993	24.6507	29.0671
- Food	Tg Nr	2.04771	6.43792	6.78753	6.02649	6.76646	7.88447	9.87259	6.95584	10.499
- Feed	Tg Nr	0.43733	14.1511	6.91593	13.4821	9.04584	47.6802	14.304	14.5849	16.2636
- Seed	Tg Nr	0.0791668	0.247196	0.262957	0.221902	0.276388	0.319692	0.361718	0.149345	0.393417
- Material and waste	Tg Nr	0.333887	1.15127	1.15888	1.09108	1.16758	1.48635	1.761	1.30119	1.91108
- Bioenergy	Tg Nr	0	1.3618	0	1.37407	0	1.59966	0	1.65936	0
Crop production	Tg Nr	2.61854	15.4941	11.9128	14.1518	11.8029	20.2149	24.1575	9.08199	18.6138
Crop Net-Exports	Tg Nr	-0.279555	-7.85514	-3.21253	-8.04385	-5.45339	-38.7554	-2.14175	-15.5687	-10.4533
Livestock Sector
Total livestock demand	Tg DM	5.95156	50.5798	37.6922	51.138	41.133	83.5131	77.5145	70.6584	93.661
- Food	Tg DM	5.57595	48.2404	35.5704	48.8304	38.8942	80.6788	73.3047	68.2258	88.745
Livestock production	Tg DM	8.75289	129.441	60.2646	120.728	40.5924	231.079	134.194	131.472	121.513
Livestock Net-Exports	Tg DM	2.80133	78.8607	22.5724	69.5898	-0.540622	147.566	56.6794	60.8133	27.8519
Fooduse livestock demand	Tg Nr	0.287066	2.48356	1.83127	2.51393	2.00239	4.15358	3.77394	3.51247	4.56886
Total livestock demand	Tg Nr	0.305589	2.59573	1.93364	2.62448	2.11028	4.28946	3.97512	3.62914	4.80344
Livestock production	Tg Nr	0.437388	6.1809	2.94226	5.76831	2.09089	11.2702	6.47207	6.26795	5.94599
Livestock Net-Exports	Tg Nr	0.131799	3.58517	1.00862	3.14383	-0.019393	6.9807	2.49695	2.6388	1.14255
Total Feed	Tg Nr	15.9189	72.2055	55.4605	66.8349	59.1082	118.855	76.9267	51.184	76.0993
Slaughtered Animals	Tg Nr	0.564026	7.08267	4.27162	6.61309	2.91152	14.0273	7.54979	7.16542	7.20873
Manure	Tg Nr	15.3549	65.1228	51.1889	60.2218	56.1967	104.828	69.3769	44.0186	68.8906
Manure in confinement	Tg Nr	2.30763	22.5728	12.9243	20.8955	15.1542	70.5492	27.6074	24.0595	28.7594
- applied to cropland	Tg Nr	1.67295	14.9581	8.16673	12.3719	9.00292	46.5625	17.0338	13.4758	15.4106
- applied to pasture	Tg Nr	0	5.47829	1.52522	4.52088	1.70015	23.9867	6.18618	6.94206	5.60032
- lost	Tg Nr	0.634681	2.13636	3.23231	4.00267	4.45112	0	4.38747	3.64165	7.74851
Manure on pasture	Tg Nr	13.0473	42.55	38.2647	39.3263	41.0425	34.2787	41.7695	19.9591	40.1312
- collected for fuel	Tg Nr	0.605566	0.813792	1.23571	0.605586	0.549704	0	0.792996	0	0.694509
feed per animal product	kg Nr / t DM	1.81871	0.557827	0.920284	0.5536	1.45614	0.514349	0.573251	0.389316	0.626265
manure per animal product	kg Nr / t DM	1.75427	0.50311	0.849403	0.498823	1.38442	0.453646	0.516991	0.334814	0.566941
Crop Residues
Crop Residues	Tg DM	301.426	918.068	811.993	859.165	802	1031.19	1160.03	620.73	1096.74
- used for feed	Tg DM	195.927	596.749	608.995	549.37	601.5	696.988	939.623	349.796	888.356
- recycled to soils	Tg DM	14.8723	177.341	31.6662	175.082	31.1909	209.176	38.1637	196.073	35.9439
- other uses	Tg DM	90.6269	143.977	171.332	134.713	169.309	125.022	182.242	74.8608	172.436
BG Crop Residues	Tg DM	100.068	1036.73	375.451	997.198	363.499	1238.79	727.62	921.846	554.439
AG Crop Residues	Tg Nr	2.76149	9.98219	7.68064	9.38835	7.49025	11.341	11.7699	7.02241	10.4066
- used for feed	Tg Nr	1.79497	5.91282	5.76048	5.43881	5.61769	6.98629	9.53359	3.35123	8.42931
- recycled to soils	Tg Nr	0.136602	2.50667	0.301205	2.48006	0.293031	2.98445	0.390724	2.82593	0.343869
- other uses	Tg Nr	0.829918	1.56269	1.61895	1.46949	1.57953	1.37023	1.84555	0.845252	1.63338
BG Crop Residues	Tg Nr	0.863034	5.8726	3.75867	5.444	3.59259	7.41584	8.15036	3.74952	5.68644
Conversion Byproducts
Conversion Byproduct Demand	Tg DM	10.3577	92.9211	51.6777	81.8517	24.7023	355.622	101.959	165.044	117.213
- used as feed	Tg DM	9.69774	92.2611	51.0177	81.1917	24.0423	354.962	101.299	164.384	116.553
Conversion Byproduct Production	Tg DM	11.0131	35.1368	36.7679	32.9588	36.7158	43.417	53.8598	38.2524	57.4705
Conversion Byproduct Net-Exports	Tg DM	0.65533	-57.7843	-14.9098	-48.893	12.0135	-312.205	-48.0987	-126.791	-59.7422
Conversion Byproduct Demand	Tg Nr	0.395994	5.39387	1.95288	4.68826	1.95173	21.2656	7.07285	9.03602	7.34764
- used as feed	Tg Nr	0.387018	5.38489	1.9439	4.67928	1.94275	21.2567	7.06387	9.02704	7.33866
Conversion Byproduct Production	Tg Nr	0.406559	1.30475	1.36125	1.22486	1.36024	1.61788	1.99967	1.42469	2.13656
Conversion Byproduct Net-Exports	Tg Nr	0.0105649	-4.08912	-0.591632	-3.4634	-0.591488	-19.6477	-5.07318	-7.61133	-5.21108
Other Nr inputs
Nr fixation crops	Tg Nr	1.02525	8.12399	5.16472	7.1715	4.85372	11.6125	12.7497	3.5994	7.68923
Nr fixation cropland area	Tg Nr	1.0549	1.43696	1.57009	1.32329	1.45856	1.17126	1.49655	0.779955	1.45425
Nr deposition on cropland	Tg Nr	1.06903	4.98003	4.40729	4.43243	4.49654	7.84901	6.00532	3.0316	5.34685
Soil organic matter loss	Tg Nr	3.52605	-5.60952e-05	0.00357696	-0.000325991	-0.00876966	-0.000348338	-0.00425349	4.69425e-13	-0.00673814
Inorganic Fertilizer	Tg Nr	1.01	8.54191	14.3823	7.16521	8.48145	0	18.538	0	9.79931
Cropland Soil Budgets
Total Nr withdrawals	Tg Nr	6.24306	31.3489	23.3521	28.9842	22.8857	38.9718	44.0777	19.8539	34.7068
Total Nr inputs	Tg Nr	10.437	46.6674	38.0175	40.61	32.4464	77.9148	64.7219	27.6115	46.1172
NUpE	share	0.598167	0.671752	0.614246	0.71372	0.705338	0.500184	0.681032	0.719045	0.752579
Crop uptake from soils	Tg Nr	5.13864	22.9777	17.9244	21.5908	17.7556	27.0396	30.9663	16.1052	26.6242
inputs to cropland soils	Tg Nr	9.33257	38.2962	32.5898	33.2166	27.3163	65.9827	51.6105	23.8628	38.0345
Soil Nr uptake efficiency (SNUpE)	share	0.550614	0.6	0.55	0.65	0.65	0.409798	0.6	0.674908	0.7
Losses	Tg Nr	4.19393	15.3185	14.6654	11.6258	9.56071	38.9431	20.6442	7.75759	11.4104
Nitrogen use efficiency (NUE)	kg Nr / tDM	57.6849	32.9582	50.3972	30.0223	43.5805	45.7958	45.1377	23.9148	39.9079
inorganic fertilizer per harvest	kg Nr / tDM	5.58224	6.0326	19.0656	5.29713	11.3919	0	12.9286	0	8.47991
manure per t harvest	kg Nr / tDM	9.24636	10.5639	10.8261	9.14636	12.0923	27.3679	11.8795	11.6716	13.3357
biologic fixation per t harvest	kg Nr / tDM	11.4969	6.75227	8.92787	6.28006	8.47836	7.51386	9.93549	3.79304	7.91238
manure per mineral fertilizer	ratio	1.65639	1.75114	0.567833	1.72667	1.06148	#DIV/0!	0.91886	#DIV/0!	1.57262
biological fixation per mineral fertilizer	ratio	2.05955	1.1193	0.468272	1.18556	0.744245	#DIV/0!	0.768491	#DIV/0!	0.933074
harvested N per capita	kg Nr / capita	4.44546	14.2541	10.5623	13.0193	10.335	13.8649	14.503	6.22909	10.8707
fertilizer N per capita	kg Nr / capita	1.71466	7.85831	12.7518	6.59179	7.42667	0	11.1293	0	5.7229
harvested N per food demand	Tg Nr / EJ	1.3813	3.86459	2.9778	3.56605	2.9897	3.04003	3.61371	1.45492	2.73106
fertilizer N per food demand	Tg Nr / EJ	0.532783	2.13055	3.59509	1.80553	2.14838	0	2.77309	0	1.43778
Nr withdrawals per ha	kg / ha	31.8085	99.5729	74.2295	100.512	79.359	124.578	139.123	123.253	119.28
Nr inputs per ha	kg / ha	53.1767	148.229	120.847	140.828	112.512	249.064	204.282	171.412	158.495
Emissions
N2O emissions	Tg N2O-N	0.374492	1.42776	1.27386	1.32024	1.28883	1.77925	1.69176	0.82895	1.50965
N2O per capita	kg N2O-N / capita	0.635769	1.3135	1.12945	1.21458	1.12854	1.22034	1.01565	0.568554	0.881653
N2O per food energy	kg N2O-N / EJ	0.197548	0.356116	0.318424	0.33268	0.326463	0.267574	0.253069	0.132796	0.221499

## Sheet: CPA
CPA		1995	2045				2095
			A1	A2	B1	B2	A1	A2	B1	B2
Population and GDP
Population	Million capita	1340.59	1526.94	1750.11	1526.94	1570.51	1469.04	2193.65	1469.04	1679.02
GDP per capita	US$05 per capita	724.54	4878.52	1646.66	2592.99	5991.94	23131.4	3244.25	8271.28	14698.4
Food demand
Food demand (after processing)	EJ	5.37512	7.5361	7.6945	6.88012	7.68781	8.52262	10.4089	7.25977	8.78796
Livestock demand (after processing)	EJ	0.714407	2.28542	1.39877	1.96011	2.60893	2.03802	1.7486	1.36123	1.97518
Livestock product share	share	0.13291	0.303263	0.181789	0.284895	0.33936	0.239131	0.167991	0.187503	0.22476
Food demand	kcal per capita per day	2625.47	3231.76	2878.93	2950.45	3205.37	3798.87	3107.08	3235.97	3427.27
Animal product demand	kcal per capita per day	348.951	980.075	523.358	840.569	1087.77	908.427	521.962	606.755	770.312
Cropland area and yields
Cropland Area	Million ha	143.742	152.581	152.434	151.308	151.75	152.001	154.897	144.329	150.755
Average yield	t DM / ha	4.84373	12.148	9.39032	11.5852	10.1022	12.9905	13.803	12.7069	10.3747
Average yield	kg Nr / ha	86.2609	197.383	167.651	184.078	184.73	216.533	246.303	185.291	195.984
Harvested Crops
Crop demand	Tg DM	718.554	1816.31	1509.66	1531.24	1625.73	1206.28	2231.78	992.917	1450.73
- Food	Tg DM	378.29	469.291	690.418	416.654	471.157	381.879	1165.63	340.035	591.909
- Feed	Tg DM	264.733	845.558	669.984	631.108	1023.74	284.962	821.06	129.707	714.673
- Seed	Tg DM	16.478	50.0835	35.6755	46.165	34.5238	54.7522	61.4782	49.5568	43.9468
- Material and waste	Tg DM	59.0533	92.5841	113.583	78.5273	96.3101	66.1014	183.615	55.0308	100.202
- Bioenergy	Tg DM	0	358.789	0	358.789	0	418.587	0	418.587	0
Crop production	Tg DM	696.246	1853.56	1431.4	1752.93	1533.01	1974.58	2138.04	1833.97	1564.04
Crop Net-Exports	Tg DM	-22.308	37.2498	-78.2578	221.691	-92.7208	768.292	-93.7382	841.05	113.309
Crop demand	Tg Nr	13.1233	31.9188	28.8541	26.0184	32.8246	17.6042	41.6375	12.5033	30.9234
- Food	Tg Nr	6.92956	8.59651	12.6471	7.63231	8.6307	6.9953	21.3521	6.22878	10.8426
- Feed	Tg Nr	4.5745	19.3403	12.9536	14.8228	21.2599	6.85965	14.9931	3.13813	16.8001
- Seed	Tg Nr	0.321552	1.26569	0.757409	1.15585	0.817558	1.50131	1.25735	1.13171	1.07865
- Material and waste	Tg Nr	1.29772	2.03457	2.49603	1.72567	2.11645	1.4526	4.03502	1.20932	2.20199
- Bioenergy	Tg Nr	0	0.681699	0	0.681699	0	0.795316	0	0.795316	0
Crop production	Tg Nr	12.3993	30.1169	25.5557	27.8525	28.0328	32.9134	38.1516	26.7429	29.5456
Crop Net-Exports	Tg Nr	-0.724034	-1.80186	-3.29847	1.83415	-4.79181	15.3092	-3.48589	14.2396	-1.37777
Livestock Sector
Total livestock demand	Tg DM	28.7679	108.985	79.9082	82.2926	118.827	53.341	112.56	33.8462	80.488
- Food	Tg DM	27.5902	96.0395	71.1921	73.321	107.048	48.3886	96.5173	30.6574	69.5352
Livestock production	Tg DM	28.7234	88.171	74.3959	63.9636	108.322	29.0047	99.9803	12.779	72.2549
Livestock Net-Exports	Tg DM	-0.0444978	-20.8139	-5.51236	-18.3289	-10.5048	-24.3363	-12.5792	-21.0671	-8.23316
Fooduse livestock demand	Tg Nr	1.45736	5.07297	3.76049	3.87294	5.65444	2.55597	5.09821	1.61938	3.67297
Total livestock demand	Tg Nr	1.51867	5.69204	4.18098	4.30388	6.21794	2.79575	5.86928	1.77354	4.19722
Livestock production	Tg Nr	1.51639	4.67039	3.91307	3.40442	5.69323	1.55499	5.27113	0.67163	3.82263
Livestock Net-Exports	Tg Nr	-0.00228171	-1.02165	-0.267912	-0.899458	-0.524711	-1.24076	-0.598157	-1.10191	-0.374592
Total Feed	Tg Nr	13.9508	33.6732	32.3991	26.5156	44.3153	18.0447	41.0616	12.657	30.9241
Slaughtered Animals	Tg Nr	2.08589	5.99544	6.11358	4.32848	7.65944	1.92896	6.87435	0.908028	5.0371
Manure	Tg Nr	11.8649	27.6777	26.2855	22.1871	36.6559	16.1158	34.1873	11.749	25.887
Manure in confinement	Tg Nr	7.17205	24.5398	20.13	19.8369	27.4498	15.7217	29.8644	11.4911	22.8023
- applied to cropland	Tg Nr	4.37026	15.6943	11.3716	11.1871	14.4118	10.3763	17.4765	6.30382	11.5131
- applied to pasture	Tg Nr	0	5.696	2.14945	4.02212	2.74049	5.34539	6.3082	3.24742	4.11643
- lost	Tg Nr	2.8018	3.14959	6.60896	4.62774	10.2975	0	6.07971	1.93981	7.17279
Manure on pasture	Tg Nr	4.69285	3.13789	6.15548	2.35019	9.20607	0.394013	4.32292	0.257944	3.08469
- collected for fuel	Tg Nr	0.16625	0.0116434	0.0833128	0.16625	0.167578	0	0.0280408	0	0.0195951
feed per animal product	kg Nr / t DM	0.485695	0.381908	0.435496	0.414542	0.409106	0.622131	0.410697	0.990452	0.427986
manure per animal product	kg Nr / t DM	0.413075	0.31391	0.35332	0.346871	0.338396	0.555626	0.34194	0.919396	0.358273
Crop Residues
Crop Residues	Tg DM	711.577	1721.88	1419.04	1634.92	1431.62	1851.55	2200.19	1748.47	1668.65
- used for feed	Tg DM	295.588	1022.89	748.213	959.957	857.336	1179.9	1337.5	1048.89	1119.87
- recycled to soils	Tg DM	198.968	419.626	365.969	410.786	268.222	439.84	506.218	481.117	280.148
- other uses	Tg DM	217.021	279.366	304.856	264.178	306.065	231.809	356.477	218.457	268.631
BG Crop Residues	Tg DM	314.184	1027.6	616.592	980.204	671.745	1114.32	916.941	1030.73	687.602
AG Crop Residues	Tg Nr	6.15233	15.333	12.3589	14.5907	13.0251	16.7198	18.5295	15.3695	14.2406
- used for feed	Tg Nr	2.83045	8.98177	7.01814	8.43996	8.25418	10.3997	11.8553	9.03648	9.91187
- recycled to soils	Tg Nr	1.44992	3.87972	2.69465	3.80706	1.99554	4.24248	3.68557	4.42474	2.04559
- other uses	Tg Nr	1.87195	2.47153	2.64612	2.34372	2.77541	2.07759	2.98863	1.90828	2.28311
BG Crop Residues	Tg Nr	3.18796	6.76211	5.98576	6.17475	6.66607	6.81081	8.66412	5.98624	6.25853
Conversion Byproducts
Conversion Byproduct Demand	Tg DM	59.8517	32.3818	102.032	36.5957	90.5986	33.0236	176.769	43.8857	30.15
- used as feed	Tg DM	29.7017	2.2318	71.8818	6.44567	60.4486	2.87356	146.619	13.7357	0
Conversion Byproduct Production	Tg DM	59.0937	77.0701	108.982	67.7111	78.0301	60.917	182.408	53.4971	93.982
Conversion Byproduct Net-Exports	Tg DM	-0.757963	44.6883	6.94989	31.1154	-12.5685	27.8934	5.63862	9.61142	63.832
Conversion Byproduct Demand	Tg Nr	2.45359	1.89985	5.22518	0.96696	4.89059	0.995314	9.28869	0.967874	0.96696
- used as feed	Tg Nr	1.48663	0.932889	4.25822	0	3.92363	0.0283539	8.32173	0.000914107	0
Conversion Byproduct Production	Tg Nr	2.48569	3.29604	4.60044	2.88599	3.34605	2.58058	7.67735	2.25574	3.9751
Conversion Byproduct Net-Exports	Tg Nr	0.0320984	1.39619	-0.624747	1.91903	-1.54454	1.58527	-1.61134	1.28787	3.00814
Other Nr inputs
Nr fixation crops	Tg Nr	3.0837	7.44831	5.91529	6.54018	8.4994	8.46159	5.88453	4.5888	6.38354
Nr fixation cropland area	Tg Nr	1.5033	0.966014	1.46483	0.990465	1.19168	0.740326	1.51058	1.14409	1.20638
Nr deposition on cropland	Tg Nr	2.64724	5.35587	4.8266	4.30083	4.97615	4.97259	6.9248	3.54819	4.39645
Soil organic matter loss	Tg Nr	5.65265	0.189251	0.614952	0.551837	0.158706	8.76032e-05	-0.00237023	6.82674e-14	0.0107543
Inorganic Fertilizer	Tg Nr	23.64	39.6495	40.7282	35.9448	29.6879	50.3258	58.7465	39.1331	35.4014
Cropland Soil Budgets
Total Nr withdrawals	Tg Nr	21.7396	52.212	43.9003	48.618	47.724	56.4439	65.3453	48.0986	50.0447
Total Nr inputs	Tg Nr	45.8566	81.2107	74.3593	70.6529	68.4048	87.4313	104.147	66.2607	68.2944
Nr uptake efficiency (NUpE)	share	0.474078	0.64292	0.590381	0.688125	0.697671	0.64558	0.62743	0.7259	0.73278
Crop uptake from soils	Tg Nr	18.3343	43.498	37.2276	40.9219	38.4071	46.481	58.2034	42.3781	42.5825
inputs to cropland soils	Tg Nr	42.4513	72.4967	67.6866	62.9568	59.0878	77.4684	97.0056	60.5401	60.8322
Soil Nr uptake efficiency (SNUpE)	share	0.431891	0.6	0.55	0.65	0.65	0.6	0.6	0.7	0.7
Losses	Tg Nr	24.117	28.9987	30.459	22.0349	20.6807	30.9874	38.8022	18.162	18.2497
Nitrogen use efficiency (NUE)	kg Nr / tDM	65.8626	43.8135	51.9486	40.3055	44.6213	44.2785	48.7116	36.1297	43.6654
inorganic fertilizer per harvest	kg Nr / tDM	33.9535	21.3911	28.4533	20.5055	19.3658	25.4869	27.4767	21.3379	22.6346
manure per t harvest	kg Nr / tDM	6.27689	8.46711	7.9444	6.38192	9.401	5.25498	8.17405	3.43726	7.36113
biologic fixation per t harvest	kg Nr / tDM	6.58818	4.53956	5.15586	4.29602	6.32162	4.6602	3.45882	3.12595	4.85277
manure per mineral fertilizer	ratio	0.184867	0.395825	0.279208	0.31123	0.485444	0.206184	0.29749	0.161087	0.325216
biological fixation per mineral fertilizer	ratio	0.194035	0.212218	0.181204	0.209506	0.326432	0.182847	0.125882	0.146497	0.214396
harvested N per capita	kg Nr / capita	9.24911	19.7237	14.6024	18.2407	17.8496	22.4046	17.3918	18.2043	17.597
fertilizer N per capita	kg Nr / capita	17.634	25.9666	23.2718	23.5404	18.9034	34.2575	26.7802	26.6385	21.0846
harvested N per food demand	Tg Nr / EJ	2.30679	3.99635	3.32129	4.04826	3.6464	3.86188	3.66529	3.68371	3.36206
fertilizer N per food demand	Tg Nr / EJ	4.39804	5.26128	5.29316	5.22445	3.86168	5.90496	5.64387	5.3904	4.0284
Nr withdrawals per ha	kg / ha	151.241	342.193	287.996	321.317	314.491	371.338	421.863	333.257	331.96
Nr inputs per ha	kg / ha	319.021	532.247	487.814	466.946	450.772	575.201	672.366	459.095	453.015
Emissions
N2O emissions	Tg N2O-N	0.702585	1.14731	1.22449	1.0089	1.27366	1.03369	1.52469	0.840914	1.04477
N2O per capita	kg N2O-N / capita	0.524086	0.751374	0.699664	0.660734	0.810987	0.703648	0.695045	0.572423	0.622254
N2O per food energy	kg N2O-N / EJ	0.130711	0.152241	0.159138	0.14664	0.165673	0.121288	0.146479	0.115832	0.118887

## Sheet: EUR
EUR		1995	2045				2095
			A1	A2	B1	B2	A1	A2	B1	B2
Population and GDP
Population	Million capita	577.982	608.021	621.837	608.021	587.294	615.827	646.905	615.827	565.188
GDP per capita	US$05 per capita	21209.4	34599.3	29124.3	35880.1	33479.6	60907.4	41355	57528.1	44603.4
Food demand
Food demand (after processing)	EJ	2.91815	3.34767	3.3475	3.32683	3.15296	3.69195	3.70851	3.56161	3.11957
Livestock demand (after processing)	EJ	0.836484	1.01695	0.900181	0.672759	0.673564	0.908082	0.819837	0.197647	0.337141
Livestock product share	share	0.286649	0.303779	0.268911	0.202222	0.213629	0.245963	0.221069	0.0554935	0.108073
Food demand	kcal per capita per day	3306.04	3605.28	3525	3582.84	3515.44	3925.66	3753.83	3787.08	3614.23
Animal product demand	kcal per capita per day	947.674	1095.21	947.913	724.53	750.999	965.567	829.856	210.158	390.601
Cropland area and yields
Cropland Area	Million ha	149.911	150.273	150.292	150.192	150.211	150.273	150.292	123.554	150.211
Average yield	t DM / ha	3.36527	5.48522	4.66908	5.29675	4.33736	5.76674	5.87166	6.20825	4.41894
Average yield	kg Nr / ha	68.4614	102.987	101.27	95.9369	93.3797	103.786	128.857	101.269	98.5687
Harvested Crops
Crop demand	Tg DM	511.665	1060.27	714.057	996.419	605.942	688.333	941.914	597.209	578.064
- Food	Tg DM	178.822	222.735	234.957	247.243	212.35	251.623	319.444	280.174	248.531
- Feed	Tg DM	280.63	578.581	408.368	493.053	332.87	145.269	530.92	33.5182	267.46
- Seed	Tg DM	15.6541	24.0058	23.8968	22.6973	21.1513	24.5737	31.9712	20.5838	21.4188
- Material and waste	Tg DM	36.5592	46.5895	46.8352	45.061	39.5702	48.6539	59.5782	43.1748	40.6542
- Bioenergy	Tg DM	0	188.364	0	188.364	0	218.213	0	219.758	0
Crop production	Tg DM	504.49	824.281	701.726	795.531	651.52	866.585	882.464	767.052	663.775
Crop Net-Exports	Tg DM	-7.17566	-235.994	-12.3305	-200.887	45.5783	178.252	-59.4497	169.843	85.7114
Crop demand	Tg Nr	10.5728	19.9828	15.2272	19.7651	12.9835	10.7825	20.1276	8.5113	12.7976
- Food	Tg Nr	3.75199	4.67335	4.9298	5.18757	4.45546	5.27947	6.70248	5.87852	5.2146
- Feed	Tg Nr	5.7063	13.3734	8.73751	12.7175	7.19084	3.43695	11.388	0.829186	6.1838
- Seed	Tg Nr	0.332904	0.582174	0.558637	0.538808	0.491311	0.588977	0.763485	0.463057	0.530067
- Material and waste	Tg Nr	0.781566	0.995996	1.00125	0.96332	0.845936	1.04013	1.27367	0.922995	0.86911
- Bioenergy	Tg Nr	0	0.357892	0	0.357892	0	0.437011	0	0.417541	0
Crop production	Tg Nr	10.2631	15.4761	15.22	14.409	14.0267	15.5963	19.3661	12.5122	14.8061
Crop Net-Exports	Tg Nr	-0.309668	-4.50665	-0.0071447	-5.35608	1.04313	4.81375	-0.761469	4.00086	2.00854
Livestock Sector
Total livestock demand	Tg DM	44.1054	72.0689	57.7505	50.5975	41.3256	49.8668	67.9251	13.0311	27.1093
- Food	Tg DM	35.2153	48.8132	43.3371	30.4814	28.6944	41.2671	45.6562	6.4588	13.7814
Livestock production	Tg DM	44.404	84.5623	63.8953	65.9946	52.5471	19.351	85.6362	5.49896	41.6234
Livestock Net-Exports	Tg DM	0.298592	12.4934	6.14485	15.3971	11.2215	-30.5158	17.7112	-7.53211	14.5141
Fooduse livestock demand	Tg Nr	1.77522	2.4607	2.18464	1.53658	1.4465	2.08029	2.30155	0.325591	0.694727
Total livestock demand	Tg Nr	2.19392	3.54519	2.86063	2.47517	2.03832	2.48669	3.34285	0.636804	1.31834
Livestock production	Tg Nr	2.20806	4.19818	3.16884	3.27133	2.61772	0.962738	4.23832	0.268059	2.05095
Livestock Net-Exports	Tg Nr	0.014133	0.652985	0.308205	0.796158	0.579405	-1.52395	0.895472	-0.368745	0.732608
Total Feed	Tg Nr	15.6641	25.334	21.0896	19.3247	16.5852	6.89982	26.4553	2.01728	12.4211
Slaughtered Animals	Tg Nr	2.7652	5.58473	4.03625	4.36631	3.37687	1.20731	5.50006	0.320234	2.6709
Manure	Tg Nr	12.8989	19.7493	17.0533	14.9584	13.2084	5.69251	20.9552	1.69705	9.75015
Manure in confinement	Tg Nr	8.48355	14.9072	11.5434	11.3963	9.06699	3.77257	14.77	1.05412	6.96022
- applied to cropland	Tg Nr	3.25399	8.72761	5.15694	5.9041	3.81315	2.4899	7.87595	0.574568	3.21637
- applied to pasture	Tg Nr	1.6763	4.49604	2.65661	3.04151	1.96435	1.28267	4.05731	0.295989	1.65692
- lost	Tg Nr	3.55326	1.6836	3.72983	2.45066	3.2895	0	2.83675	0.183559	2.08693
Manure on pasture	Tg Nr	4.41533	4.84201	5.50996	3.56209	4.14138	1.91994	6.18519	0.642932	2.78993
- collected for fuel	Tg Nr	0	0	0	0	0	0	0	0	0
feed per animal product	kg Nr / t DM	0.352763	0.29959	0.330065	0.292822	0.315626	0.356561	0.308926	0.366848	0.298415
manure per animal product	kg Nr / t DM	0.290489	0.233547	0.266895	0.22666	0.251363	0.294171	0.2447	0.308613	0.234247
Crop Residues
Crop Residues	Tg DM	504.859	762.7	732.712	744.836	711.475	810.197	946.165	676.868	715.513
- used for feed	Tg DM	46.388	38.2804	51.8014	27.01	37.3276	25.4605	51.7672	17.2842	31.7042
- recycled to soils	Tg DM	392.962	627.209	586.084	623.141	582.739	681.633	771.692	573.686	592.374
- other uses	Tg DM	65.5083	97.2112	94.8268	94.6848	91.4081	103.104	122.705	85.8971	91.4351
BG Crop Residues	Tg DM	266.277	526.851	366.071	508.736	338.685	561.082	456.706	510.026	341.001
AG Crop Residues	Tg Nr	4.49831	6.97513	6.44689	6.79096	6.18499	7.33275	8.22025	6.22884	6.30574
- used for feed	Tg Nr	0.688494	0.559785	0.769628	0.403477	0.562976	0.401277	0.777007	0.310053	0.532415
- recycled to soils	Tg Nr	3.23358	5.53625	4.85257	5.53331	4.83518	6.00804	6.38899	5.13675	4.97539
- other uses	Tg Nr	0.576245	0.879101	0.824696	0.854169	0.786828	0.923431	1.05426	0.782041	0.797933
BG Crop Residues	Tg Nr	2.85693	3.65086	3.82048	3.38503	3.39601	3.63238	4.68851	3.09973	3.40751
Conversion Byproducts
Conversion Byproduct Demand	Tg DM	69.8558	76.8224	80.3771	15.888	69.9198	12.0627	109.755	6.10064	37.204
- used as feed	Tg DM	64.8158	71.7824	75.3371	10.848	64.8798	7.02272	104.715	1.06064	32.164
Conversion Byproduct Production	Tg DM	45.2219	56.5803	59.1285	61.203	52.7748	62.9604	79.4031	67.4548	60.4039
Conversion Byproduct Net-Exports	Tg DM	-24.6339	-20.242	-21.2486	45.315	-17.145	50.8977	-30.3522	61.3542	23.1999
Conversion Byproduct Demand	Tg Nr	3.76945	4.71161	4.55461	1.23678	3.51599	0.712898	6.1475	0.163183	2.02558
- used as feed	Tg Nr	3.6948	4.63696	4.47997	1.16214	3.44135	0.63825	6.07285	0.0885348	1.95093
Conversion Byproduct Production	Tg Nr	2.19584	2.74861	2.8697	2.96542	2.55809	3.05391	3.84887	3.2589	2.92115
Conversion Byproduct Net-Exports	Tg Nr	-1.57361	-1.963	-1.68491	1.72863	-0.957904	2.34101	-2.29863	3.09571	0.895572
Other Nr inputs
Nr fixation crops	Tg Nr	2.33841	4.81457	3.67484	3.9309	2.88166	4.34092	4.45109	2.95293	3.79022
Nr fixation cropland area	Tg Nr	0.580174	0.546745	0.585956	0.57975	0.609591	0.578633	0.600397	0.49827	0.57153
Nr deposition on cropland	Tg Nr	1.85247	2.8255	2.73658	2.19934	2.06126	1.87551	3.31648	1.08271	1.71838
Soil organic matter loss	Tg Nr	0.763493	1.16621e-05	1.16621e-05	-7.38801e-14	-2.22745e-14	1.02603e-08	1.02602e-08	-7.38801e-14	-2.22745e-14
Inorganic Fertilizer	Tg Nr	13.01	13.222	21.491	13.345	16.4151	21.4681	22.2302	15.929	14.9667
Cropland Soil Budgets
Total Nr withdrawals	Tg Nr	17.6183	26.1021	25.4874	24.585	23.6077	26.5614	32.2749	21.8407	24.5194
Total Nr inputs	Tg Nr	28.2219	39.9057	42.877	35.4163	34.5033	40.9824	50.3151	29.7371	33.1761
Nr uptake efficiency (NUpE)	share	0.624278	0.654095	0.594431	0.694172	0.684215	0.648117	0.641455	0.734462	0.739067
Crop uptake from soils	Tg Nr	14.947	20.7054	21.2539	20.1153	20.2347	21.6315	27.0603	18.4248	20.1991
inputs to cropland soils	Tg Nr	25.5506	34.509	38.6435	30.9465	31.1303	36.0525	45.1006	26.3211	28.8558
Soil Nr uptake efficiency (SNUpE)	share	0.584996	0.6	0.55	0.65	0.65	0.6	0.6	0.7	0.7
Losses	Tg Nr	10.6036	13.8036	17.3896	10.8313	10.8956	14.421	18.0402	7.89632	8.65675
Nitrogen use efficiency (NUE)	kg Nr / tDM	55.9416	48.4127	61.1022	44.519	52.9581	47.2919	57.0166	38.768	49.981
inorganic fertilizer per harvest	kg Nr / tDM	25.7884	16.0406	30.6259	16.775	25.1951	24.7732	25.1911	20.7666	22.5478
manure per t harvest	kg Nr / tDM	6.45007	10.5881	7.34894	7.42158	5.85269	2.87323	8.92495	0.749059	4.84557
biologic fixation per t harvest	kg Nr / tDM	5.78522	6.50423	6.07188	5.66998	5.35862	5.67694	5.7243	4.4993	6.57112
manure per mineral fertilizer	ratio	0.250115	0.660084	0.239958	0.44242	0.232295	0.115981	0.35429	0.0360704	0.214902
biological fixation per mineral fertilizer	ratio	0.224334	0.405485	0.19826	0.338002	0.212685	0.229157	0.227235	0.216661	0.291431
harvested N per capita	kg Nr / capita	17.7568	25.4533	24.4759	23.6982	23.8836	25.3258	29.9366	20.3177	26.1968
fertilizer N per capita	kg Nr / capita	22.5093	21.7459	34.5605	21.9483	27.9505	34.8606	34.364	25.8661	26.4808
harvested N per food demand	Tg Nr / EJ	3.51699	4.62296	4.54669	4.33115	4.44873	4.2244	5.22209	3.51306	4.74621
fertilizer N per food demand	Tg Nr / EJ	4.45831	3.94961	6.42001	4.01133	5.20625	5.81483	5.99439	4.47242	4.79767
Nr withdrawals per ha	kg / ha	117.526	173.698	169.586	163.69	157.163	176.754	214.748	176.771	163.233
Nr inputs per ha	kg / ha	188.259	265.555	285.291	235.806	229.698	272.72	334.782	240.681	220.863
Emissions
N2O emissions	Tg N2O-N	0.495242	0.602846	0.685191	0.518121	0.540003	0.492641	0.777614	0.338538	0.452269
N2O per capita	kg N2O-N / capita	0.856846	0.991489	1.10188	0.852142	0.919477	0.799967	1.20205	0.549729	0.800209
N2O per food energy	kg N2O-N / EJ	0.169711	0.18008	0.204687	0.15574	0.171268	0.133436	0.209684	0.0950518	0.144978

## Sheet: FSU
FSU		1995	2045				2095
			A1	A2	B1	B2	A1	A2	B1	B2
Population and GDP
Population	Million capita	283.16	299.436	317.715	299.436	288.868	301.786	370.735	301.786	285.498
GDP per capita	US$05 per capita	3473.58	10318.7	5556.97	5901.06	5996.49	39559.4	11536.7	20627.4	20438.8
Food demand
Food demand (after processing)	EJ	1.41037	1.66098	1.65565	1.54082	1.48744	1.89045	2.04952	1.68643	1.59047
Livestock demand (after processing)	EJ	0.364222	0.626046	0.458644	0.49553	0.475321	0.475574	0.408672	0.179959	0.225478
Livestock product share	share	0.258246	0.376913	0.277017	0.321601	0.319556	0.251566	0.199399	0.10671	0.141768
Food demand	kcal per capita per day	3261.49	3632.25	3412.29	3369.48	3371.77	4101.88	3619.97	3659.19	3647.86
Animal product demand	kcal per capita per day	842.267	1369.04	945.264	1083.63	1077.47	1031.89	721.817	390.473	517.151
Cropland area and yields
Cropland Area	Million ha	206.029	213.137	213.72	211.622	211.049	211.704	213.972	177.882	210.267
Average yield	t DM / ha	1.20557	5.41331	2.10315	5.4156	2.17735	6.27334	2.95879	6.7022	2.59301
Average yield	kg Nr / ha	24.3162	46.6778	43.4249	44.1982	44.5804	52.6763	60.89	47.1874	52.1988
Harvested Crops
Crop demand	Tg DM	280.145	1060.97	390.589	1039.37	333.474	1221.83	524.796	1178.32	233.691
- Food	Tg DM	80.2962	95.8476	119.596	91.3266	85.1544	112.142	223.725	114	109.47
- Feed	Tg DM	164.896	180.656	222.721	155.65	208.373	199.514	232.838	154.795	89.5358
- Seed	Tg DM	25.1725	26.9458	33.1538	27.7581	28.2104	28.5124	42.3991	26.8227	22.8001
- Material and waste	Tg DM	9.78083	13.9543	15.118	12.6694	11.7365	13.9374	25.8342	11.8662	11.8853
- Bioenergy	Tg DM	0	743.569	0	751.969	0	867.729	0	870.838	0
Crop production	Tg DM	248.381	1153.78	449.485	1146.06	459.527	1328.09	633.099	1192.2	545.223
Crop Net-Exports	Tg DM	-31.7643	92.8034	58.8959	106.686	126.053	106.255	108.302	13.876	311.532
Crop demand	Tg Nr	5.60137	8.66198	8.10847	7.93433	7.07181	9.70024	10.6074	9.03129	4.93205
- Food	Tg Nr	1.44086	1.71991	2.14606	1.63879	1.52803	2.01231	4.01457	2.04564	1.96435
- Feed	Tg Nr	3.42028	4.48622	4.9046	3.97892	4.66807	4.9423	5.09215	4.36101	2.20706
- Seed	Tg Nr	0.523343	0.460176	0.72255	0.455282	0.61544	0.472215	0.927765	0.436339	0.497068
- Material and waste	Tg Nr	0.2169	0.309452	0.335258	0.280958	0.260268	0.309077	0.572901	0.263146	0.263568
- Bioenergy	Tg Nr	0	1.68622	0	1.58039	0	1.96434	0	1.92516	0
Crop production	Tg Nr	5.00983	9.94875	9.28078	9.3533	9.40865	11.1517	13.0288	8.39376	10.9757
Crop Net-Exports	Tg Nr	-0.591541	1.28677	1.17231	1.41896	2.33685	1.45151	2.42136	-0.63753	6.04363
Livestock Sector
Total livestock demand	Tg DM	18.878	32.5255	29.5648	27.2965	26.8354	24.0085	38.7429	11.4986	13.9174
- Food	Tg DM	11.0958	25.0204	19.8349	20.6087	18.7553	17.3228	25.5999	5.93961	8.15235
Livestock production	Tg DM	17.9914	18.5505	24.922	15.5798	22.5888	23.9312	28.8164	18.032	10.3918
Livestock Net-Exports	Tg DM	-0.886625	-13.975	-4.64285	-11.7167	-4.24667	-0.0773225	-9.92653	6.53347	-3.52562
Fooduse livestock demand	Tg Nr	0.561232	1.26554	1.00326	1.0424	0.94865	0.876195	1.29486	0.300428	0.412349
Total livestock demand	Tg Nr	0.922416	1.61551	1.45591	1.35431	1.32432	1.19265	1.90806	0.563862	0.68146
Livestock production	Tg Nr	0.874145	0.915512	1.21989	0.768093	1.10792	1.28572	1.41067	0.981319	0.505934
Livestock Net-Exports	Tg Nr	-0.048271	-0.699996	-0.236023	-0.586213	-0.216397	0.0930713	-0.49739	0.417458	-0.175526
Total Feed	Tg Nr	8.17154	8.89318	11.4297	7.48989	10.6736	8.53457	13.1864	5.9602	5.56458
Slaughtered Animals	Tg Nr	1.03349	1.12608	1.46999	0.942415	1.34159	1.37581	1.70133	1.01543	0.602057
Manure	Tg Nr	7.13805	7.7671	9.9597	6.54747	9.33201	7.15876	11.485	4.94478	4.96252
Manure in confinement	Tg Nr	3.8882	5.36992	6.25188	4.52118	6.01538	6.17347	7.57657	4.44442	3.50818
- applied to cropland	Tg Nr	2.33944	3.43856	3.52578	2.54797	3.18789	4.07449	4.36035	2.42589	1.80115
- applied to pasture	Tg Nr	0	1.28474	0.722148	0.95199	0.652942	2.09898	1.62914	1.2497	0.672957
- lost	Tg Nr	1.54876	0.646627	2.00395	1.02121	2.17454	0	1.58707	0.76882	1.03407
Manure on pasture	Tg Nr	3.24985	2.39718	3.70782	2.02629	3.31663	0.98529	3.90846	0.500359	1.45435
- collected for fuel	Tg Nr	0	0	0	0	0	0	0	0	0
feed per animal product	kg Nr / t DM	0.454191	0.479404	0.458619	0.480744	0.472518	0.35663	0.457599	0.330534	0.53548
manure per animal product	kg Nr / t DM	0.396748	0.4187	0.399636	0.420254	0.413126	0.29914	0.398558	0.274222	0.477544
Crop Residues
Crop Residues	Tg DM	290.887	561.207	414.944	578.715	392.037	633.125	533.835	556.592	409.568
- used for feed	Tg DM	45.8928	74.3315	75.4119	67.1649	79.3562	81.9416	103.683	76.0015	83.1701
- recycled to soils	Tg DM	207.047	418.223	286.648	440.884	263.05	474.028	362.537	412.765	275.676
- other uses	Tg DM	37.9468	68.6527	52.8843	70.6652	49.6307	77.1554	67.6151	67.8256	50.7223
BG Crop Residues	Tg DM	147.204	968.464	249.306	979.616	256.165	1118.88	341.245	1051.44	297.522
AG Crop Residues	Tg Nr	2.60004	6.70353	3.9749	6.76544	3.89242	7.59695	5.27172	6.65406	4.31285
- used for feed	Tg Nr	0.598379	1.13456	1.14383	1.00702	1.26733	1.26559	1.6172	0.960456	1.507
- recycled to soils	Tg Nr	1.66716	4.75503	2.33121	4.93763	2.13886	5.41118	2.99561	4.88763	2.27666
- other uses	Tg Nr	0.334504	0.813938	0.499861	0.820786	0.486228	0.920179	0.658914	0.805981	0.52919
BG Crop Residues	Tg Nr	1.65825	3.9572	2.87968	3.81387	3.01818	4.47466	3.98	3.55483	3.57908
Conversion Byproducts
Conversion Byproduct Demand	Tg DM	13.5682	2.60267	18.021	1.57076	14.8183	12.1566	27.7621	1.58486	1.60773
- used as feed	Tg DM	12.0282	1.06267	16.481	0.0307569	13.2783	10.6166	26.2221	0.0448644	0.0677343
Conversion Byproduct Production	Tg DM	13.5252	16.6266	20.2613	15.7099	14.6319	18.9481	37.3848	18.7752	18.1328
Conversion Byproduct Net-Exports	Tg DM	-0.0429783	14.024	2.24024	14.1391	-0.18643	6.79146	9.62269	17.1903	16.5251
Conversion Byproduct Demand	Tg Nr	0.479829	0.326209	0.970121	0.020944	0.780247	1.09285	1.71955	0.024689	0.106949
- used as feed	Tg Nr	0.458885	0.305265	0.949177	0	0.759303	1.0719	1.6986	0.00374498	0.0860053
Conversion Byproduct Production	Tg Nr	0.467547	0.585198	0.702922	0.550144	0.512051	0.656278	1.28585	0.639778	0.620188
Conversion Byproduct Net-Exports	Tg Nr	-0.0122816	0.258989	-0.267199	0.5292	-0.268196	-0.43657	-0.4337	0.615089	0.513238
Other Nr inputs
Nr fixation crops	Tg Nr	1.60967	4.0627	3.99052	3.62073	4.51303	4.6081	5.84946	3.14432	5.96798
Nr fixation cropland area	Tg Nr	0.867109	0.863115	0.835873	1.06214	0.799981	0.887964	0.834917	0.785275	0.879724
Nr deposition on cropland	Tg Nr	1.71617	3.13484	2.99137	2.58535	2.49497	3.31895	3.76322	2.03141	1.90975
Soil organic matter loss	Tg Nr	3.61641	0.0742624	0.565512	0.0482806	0.198213	0.0483058	-0.00126867	0.0496584	-0.00138793
Inorganic Fertilizer	Tg Nr	2.41	10.588	7.63837	9.39951	5.3785	12.0229	9.90592	7.72529	7.27297
Cropland Soil Budgets
Total Nr withdrawals	Tg Nr	9.26813	20.6095	16.1354	19.9326	16.3193	23.2234	22.2805	18.6027	18.8676
Total Nr inputs	Tg Nr	16.4076	31.3339	25.4809	28.4708	22.3451	35.3187	32.616	25.0406	24.183
Nr uptake efficiency (NUpE)	share	0.564869	0.657738	0.633234	0.700108	0.730329	0.657537	0.683115	0.742898	0.780202
Crop uptake from soils	Tg Nr	7.13511	16.0866	11.4223	15.8566	11.1908	18.143	15.5033	15.022	12.4026
inputs to cropland soils	Tg Nr	14.2745	26.811	20.7678	24.3948	17.2166	30.2384	25.8388	21.46	17.7179
Soil Nr uptake efficiency (SNUpE)	share	0.499849	0.6	0.55	0.65	0.65	0.6	0.6	0.7	0.7
Losses	Tg Nr	7.13943	10.7244	9.3455	8.53816	6.02581	12.0954	10.3355	6.438	5.31538
Nitrogen use efficiency (NUE)	kg Nr / tDM	66.058	27.1577	56.689	24.8423	48.6262	26.5936	51.518	21.0038	44.3543
inorganic fertilizer per harvest	kg Nr / tDM	9.70283	9.17683	16.9936	8.2016	11.7044	9.05274	15.6467	6.47988	13.3394
manure per t harvest	kg Nr / tDM	9.41876	2.98027	7.84404	2.22325	6.93733	3.06794	6.88732	2.03481	3.30351
biologic fixation per t harvest	kg Nr / tDM	9.9717	4.2693	10.7376	4.08607	11.5619	4.13833	10.5582	3.29609	12.5594
manure per mineral fertilizer	ratio	0.970723	0.32476	0.461588	0.271075	0.59271	0.338896	0.440177	0.31402	0.24765
biological fixation per mineral fertilizer	ratio	1.02771	0.465226	0.631862	0.498204	0.987824	0.457135	0.674786	0.508666	0.941528
harvested N per capita	kg Nr / capita	17.6926	33.2249	29.211	31.2363	32.5708	36.9526	35.143	27.8137	38.4439
fertilizer N per capita	kg Nr / capita	8.51109	35.3598	24.0416	31.3907	18.6193	39.839	26.7197	25.5986	25.4747
harvested N per food demand	Tg Nr / EJ	3.55215	5.98968	5.60552	6.07034	6.32538	5.89898	6.35697	4.97723	6.9009
fertilizer N per food demand	Tg Nr / EJ	1.70878	6.37455	4.61352	6.10033	3.61593	6.35977	4.83328	4.58085	4.57284
Nr withdrawals per ha	kg / ha	44.9847	96.6961	75.4976	94.1898	77.3245	109.698	104.128	104.579	89.7317
Nr inputs per ha	kg / ha	79.6373	147.013	119.225	134.536	105.876	166.831	152.431	140.771	115.011
Emissions
N2O emissions	Tg N2O-N	0.281318	0.382613	0.373988	0.345905	0.322775	0.387484	0.428054	0.276064	0.253312
N2O per capita	kg N2O-N / capita	0.993494	1.27778	1.17712	1.15519	1.11738	1.28397	1.15461	0.914768	0.887263
N2O per food energy	kg N2O-N / EJ	0.199464	0.230354	0.225886	0.224494	0.216999	0.204969	0.208856	0.163697	0.159268

## Sheet: LAM
LAM		1995	2045				2095
			A1	A2	B1	B2	A1	A2	B1	B2
Population and GDP
Population	Million capita	480.177	659.112	732.698	659.112	653.973	752.142	1023.35	752.142	786.831
GDP per capita	US$05 per capita	4320.09	14454	7043.42	12334.3	7802.24	41682.3	11503	29290.3	19147.5
Food demand
Food demand (after processing)	EJ	1.94487	3.15531	3.26701	3.05124	2.89422	4.18505	5.02089	3.85742	3.87189
Livestock demand (after processing)	EJ	0.342305	0.889325	0.667043	0.757835	0.717204	0.994742	0.959156	0.49467	0.677212
Livestock product share	share	0.176005	0.281851	0.204176	0.24837	0.247806	0.23769	0.191033	0.128239	0.174905
Food demand	kcal per capita per day	2652.18	3134.71	2919.72	3031.32	2897.92	3643.48	3212.71	3358.24	3222.23
Animal product demand	kcal per capita per day	466.797	883.521	596.134	752.889	718.122	866.017	613.733	430.657	563.584
Cropland area and yields
Cropland Area	Million ha	156.37	374.548	326.397	254.521	243.156	287.158	479.466	156.991	242.388
Average yield	t DM / ha	2.77472	6.01942	4.30706	7.59206	4.73576	7.54803	5.2999	10.0074	5.01097
Average yield	kg Nr / ha	40.0299	76.5926	68.715	81.1455	78.0232	89.6538	104.388	83.6163	89.1495
Harvested Crops
Crop demand	Tg DM	390.624	2753.27	1426.28	2410.33	1159.8	2241.8	2924.58	2304.74	1356.25
- Food	Tg DM	193.455	360.879	482.787	350.756	353.299	401.082	944.994	390.921	487.524
- Feed	Tg DM	114.106	1308.72	636.968	992.944	524.001	825.774	1769.43	935.539	765.44
- Seed	Tg DM	4.23928	27.2429	14.2905	20.941	11.0104	25.7251	33.5404	16.5716	13.8567
- Material and waste	Tg DM	36.324	77.4858	92.8379	71.6029	72.0929	79.6917	176.608	67.8434	89.4246
- Bioenergy	Tg DM	42.5	978.946	199.4	974.086	199.4	909.524	0	893.864	0
Crop production	Tg DM	433.881	2254.56	1405.81	1932.34	1151.53	2167.48	2541.12	1571.07	1214.6
Crop Net-Exports	Tg DM	43.2571	-498.705	-20.4735	-477.991	-8.27767	-74.3167	-383.456	-733.668	-141.648
Crop demand	Tg Nr	5.5957	38.4118	22.0227	27.393	17.6095	28.7795	59.1067	26.3207	23.0664
- Food	Tg Nr	2.8244	5.26875	7.04858	5.12096	5.15809	5.8557	13.7967	5.70737	7.11775
- Feed	Tg Nr	2.01003	29.5195	12.7259	18.8389	10.5782	19.59	41.746	17.463	14.2481
- Seed	Tg Nr	0.10786	0.475705	0.36036	0.31331	0.300253	0.382858	0.883022	0.181932	0.343076
- Material and waste	Tg Nr	0.551412	1.17626	1.40931	1.08696	1.0944	1.20975	2.68098	1.02989	1.3575
- Bioenergy	Tg Nr	0.102	1.9716	0.47856	2.03282	0.47856	1.7412	0	1.93851	0
Crop production	Tg Nr	6.25946	28.6876	22.4284	20.6533	18.9718	25.7448	50.0504	13.127	21.6087
Crop Net-Exports	Tg Nr	0.663758	-9.7242	0.405647	-6.73969	1.36231	-3.0347	-9.05632	-13.1937	-1.45764
Livestock Sector
Total livestock demand	Tg DM	19.9922	64.7086	57.8336	52.7089	53.4706	53.9406	100.207	25.9026	46.4629
- Food	Tg DM	17.4925	59.0233	51.0865	47.649	47.9263	48.9455	87.7508	22.0076	40.3068
Livestock production	Tg DM	19.8485	90.7455	65.8659	75.9526	79.7031	66.5632	126.21	58.4974	56.2938
Livestock Net-Exports	Tg DM	-0.143713	26.0368	8.03223	23.2436	26.2325	12.6226	26.0038	32.5948	9.83089
Fooduse livestock demand	Tg Nr	0.915185	3.08803	2.67279	2.49294	2.50745	2.56077	4.59102	1.15141	2.10881
Total livestock demand	Tg Nr	1.04202	3.37481	3.01368	2.74863	2.78688	2.81466	5.22056	1.35041	2.42031
Livestock production	Tg Nr	1.04592	5.05072	3.54095	4.22422	4.06029	3.84878	6.87642	3.32285	3.015
Livestock Net-Exports	Tg Nr	0.00390259	1.67591	0.527269	1.47559	1.27341	1.03412	1.65586	1.97244	0.594683
Total Feed	Tg Nr	22.508	71.006	63.5332	61.5812	57.3976	29.0495	101.892	41.04	55.573
Slaughtered Animals	Tg Nr	1.45842	7.78295	5.56414	6.53459	5.29931	5.86773	10.3148	5.35018	4.58556
Manure	Tg Nr	21.0496	63.2231	57.9691	55.0466	52.0983	23.1817	91.5773	35.6898	50.9874
Manure in confinement	Tg Nr	3.83137	36.8629	20.5657	32.0038	15.9	20.8534	53.8924	31.6409	28.7954
- applied to cropland	Tg Nr	2.36615	23.699	11.7993	18.0941	8.58997	13.7632	31.8771	17.41	14.6032
- applied to pasture	Tg Nr	0	8.79321	2.33463	6.70784	1.6906	7.09014	11.7542	8.96876	5.39931
- lost	Tg Nr	1.46521	4.37067	6.43181	7.20193	5.61941	0	10.2611	5.26217	8.79287
Manure on pasture	Tg Nr	17.2183	26.3602	37.4034	23.0428	36.1983	2.32838	37.6849	4.04893	22.192
- collected for fuel	Tg Nr	0	0	0	0	0	0	0	0	0
feed per animal product	kg Nr / t DM	1.13399	0.782474	0.964585	0.810785	0.720142	0.43642	0.807319	0.70157	0.987195
manure per animal product	kg Nr / t DM	1.06051	0.696708	0.880109	0.72475	0.653654	0.348267	0.725592	0.610109	0.905737
Crop Residues
Crop Residues	Tg DM	441.002	1711.29	1273.06	1274.43	1013.32	1497.37	2348.58	868.005	1041.9
- used for feed	Tg DM	104.348	298.124	309.19	258.008	260.123	681.588	876.994	213.736	259.038
- recycled to soils	Tg DM	203.461	1143.9	693.901	815.667	538.407	635.371	1100.34	549.132	617.69
- other uses	Tg DM	133.193	269.266	269.969	200.75	214.787	180.408	371.241	105.137	165.173
BG Crop Residues	Tg DM	154.494	1440.33	533.292	1272.51	431.334	1520.32	1057.61	1201.08	509.973
AG Crop Residues	Tg Nr	3.7547	16.1577	11.1589	12.6304	8.933	14.7546	20.5979	9.28398	9.4045
- used for feed	Tg Nr	0.93392	3.28475	3.20636	2.81446	2.6868	6.09059	8.34613	2.19443	3.04257
- recycled to soils	Tg Nr	1.68776	10.3353	5.58975	7.83126	4.35554	6.88812	9.00251	5.96839	4.87531
- other uses	Tg Nr	1.13302	2.53765	2.36281	1.98463	1.89066	1.7759	3.24926	1.12116	1.48661
BG Crop Residues	Tg Nr	1.42048	7.86634	5.33741	6.37267	4.32501	7.79037	10.6893	4.78402	5.43947
Conversion Byproducts
Conversion Byproduct Demand	Tg DM	33.9581	175.262	131.411	248.208	104.497	9.75	146.632	272.34	249.069
- used as feed	Tg DM	24.2081	165.512	121.661	238.458	94.7474	0	136.882	262.59	239.319
Conversion Byproduct Production	Tg DM	53.1264	101.291	133.074	97.6156	98.3168	111.13	259.327	106.105	133.408
Conversion Byproduct Net-Exports	Tg DM	19.1683	-73.9716	1.6638	-150.592	-6.18052	101.38	112.695	-166.235	-115.661
Conversion Byproduct Demand	Tg Nr	1.36936	8.50625	6.91966	14.0435	5.07497	0.144532	9.39081	15.4251	13.6715
- used as feed	Tg Nr	1.23221	8.3691	6.7825	13.9063	4.93782	0.00737869	9.25366	15.288	13.5344
Conversion Byproduct Production	Tg Nr	2.76915	5.28618	6.9378	5.09194	5.1285	5.79546	13.5166	5.52686	6.9523
Conversion Byproduct Net-Exports	Tg Nr	1.39979	-3.22007	0.0181464	-8.95154	0.0535339	5.65093	4.12574	-9.89827	-6.71923
Other Nr inputs
Nr fixation crops	Tg Nr	3.45457	16.4925	13.1241	10.5782	11.9559	14.0333	30.8365	5.51357	12.739
Nr fixation cropland area	Tg Nr	0.684172	2.7669	1.48553	1.61209	0.889342	2.87874	2.38114	1.05516	1.1748
Nr deposition on cropland	Tg Nr	0.899014	2.59855	2.30731	2.19147	2.16455	1.46794	3.84357	1.29572	1.893
Soil organic matter loss	Tg Nr	3.26112	6.70952	13.0252	0.704042	0.601045	0.191614	4.60155	0.0814361	0.103107
Inorganic Fertilizer	Tg Nr	4.08	5.5967	6.71051	7.44782	9.80324	23.4761	20.3016	0.118913	5.29775
Cropland Soil Budgets
Total Nr withdrawals	Tg Nr	11.4346	52.7116	38.9247	39.6563	32.2298	48.2898	81.3376	27.195	36.4527
Total Nr inputs	Tg Nr	17.9611	76.5405	59.7394	55.145	42.9848	70.8723	114.416	36.4091	46.4687
Nr uptake efficiency (NUpE)	share	0.636632	0.688676	0.651574	0.719128	0.749794	0.681364	0.710892	0.746929	0.784457
Crop uptake from soils	Tg Nr	7.87221	35.7434	25.4403	28.7647	19.9737	33.8737	49.6181	21.4995	23.3707
inputs to cropland soils	Tg Nr	14.3987	59.5723	46.255	44.2534	30.7287	56.4561	82.6968	30.7136	33.3867
Soil Nr uptake efficiency (SNUpE)	share	0.54673	0.6	0.55	0.65	0.65	0.6	0.6	0.7	0.7
Losses	Tg Nr	6.52649	23.8289	20.8148	15.4887	10.755	22.5824	33.0787	9.21408	10.016
Nitrogen use efficiency (NUE)	kg Nr / tDM	41.3964	33.9491	42.4947	28.5379	37.3286	32.698	45.0259	23.1747	38.2585
inorganic fertilizer per harvest	kg Nr / tDM	9.4035	2.48239	4.77342	3.8543	8.51326	10.8311	7.98922	0.0756889	4.36174
manure per t harvest	kg Nr / tDM	5.45347	10.5116	8.39322	9.36382	7.45964	6.34987	12.5445	11.0816	12.0231
biologic fixation per t harvest	kg Nr / tDM	9.53889	8.54242	10.3923	6.30859	11.1549	7.80263	13.072	4.18105	11.4555
manure per mineral fertilizer	ratio	0.57994	4.23446	1.75833	2.42945	0.876238	0.586265	1.57018	146.41	2.7565
biological fixation per mineral fertilizer	ratio	1.0144	3.44121	2.17712	1.63677	1.3103	0.720394	1.63621	55.24	2.62635
harvested N per capita	kg Nr / capita	13.0357	43.5246	30.6106	31.335	29.01	34.2287	48.9083	17.4529	27.463
fertilizer N per capita	kg Nr / capita	8.49686	8.49128	9.15864	11.2998	14.9903	31.2123	19.8383	0.158099	6.73302
harvested N per food demand	Tg Nr / EJ	3.21845	9.09186	6.86511	6.76881	6.55506	6.15162	9.96842	3.40306	5.58093
fertilizer N per food demand	Tg Nr / EJ	2.09783	1.77374	2.05403	2.44092	3.38718	5.60952	4.04342	0.030827	1.36826
Nr withdrawals per ha	kg / ha	73.1257	140.734	119.256	155.807	132.548	168.164	169.642	173.226	150.39
Nr inputs per ha	kg / ha	114.863	204.354	183.027	216.662	176.779	246.806	238.633	231.918	191.712
Emissions
N2O emissions	Tg N2O-N	0.682544	1.78485	1.96644	1.59279	1.59288	0.833457	2.88623	0.840136	1.51702
N2O per capita	kg N2O-N / capita	1.42144	2.70795	2.68383	2.41656	2.4357	1.10811	2.82037	1.11699	1.92802
N2O per food energy	kg N2O-N / EJ	0.350946	0.565665	0.601908	0.522013	0.550368	0.199151	0.574844	0.217798	0.391804

## Sheet: MEA
MEA		1995	2045				2095
			A1	A2	B1	B2	A1	A2	B1	B2
Population and GDP
Population	Million capita	285.462	503.117	547.323	503.117	494.462	690.878	940.436	690.878	670.032
GDP per capita	US$05 per capita	3094.37	8240.71	4859.82	6838.57	3918.3	25851.2	7894.16	20031.9	9326.8
Food demand
Food demand (after processing)	EJ	1.26896	2.48511	2.56406	2.40413	2.23772	3.82435	4.63044	3.57841	3.2458
Livestock demand (after processing)	EJ	0.125704	0.485164	0.372192	0.453355	0.35775	0.794404	0.77189	0.468031	0.619624
Livestock product share	share	0.0990607	0.195228	0.145157	0.188573	0.159872	0.207723	0.166699	0.130793	0.1909
Food demand	kcal per capita per day	2910.81	3234.39	3067.6	3128.99	2963.39	3624.7	3224.1	3391.6	3172.06
Animal product demand	kcal per capita per day	288.347	631.444	445.286	590.044	473.764	752.932	537.454	443.597	605.547
Cropland area and yields
Cropland Area	Million ha	41.7775	46.2977	46.1582	45.9906	46.0374	46.6146	50.7644	42.4485	47.2971
Average yield	t DM / ha	2.30766	10.1954	7.87655	10.5539	7.0044	13.6922	12.1542	13.6666	9.20968
Average yield	kg Nr / ha	47.3831	214.216	163.062	220.622	150.936	298.534	249.234	278.384	200.411
Harvested Crops
Crop demand	Tg DM	165.767	582.157	643.176	535.3	463.983	646.516	1317.19	573.309	646.968
- Food	Tg DM	107.717	289.112	370.899	273.867	252.259	355.81	743.277	352.991	334.538
- Feed	Tg DM	38.7568	183.618	202.56	152.902	160.613	152.197	436.486	89.1442	242.734
- Seed	Tg DM	3.94766	18.8302	14.4023	20.5512	12.7382	28.6273	23.2783	26.8171	16.682
- Material and waste	Tg DM	15.3452	45.7483	55.3141	43.1312	38.3732	57.559	114.145	52.0337	53.014
- Bioenergy	Tg DM	0	44.8486	0	44.8486	0	52.3234	0	52.3234	0
Crop production	Tg DM	96.4083	472.023	363.568	485.379	322.464	638.259	617.003	580.128	435.591
Crop Net-Exports	Tg DM	-69.3586	-110.134	-279.608	-49.9213	-141.519	-8.25781	-700.184	6.819	-211.377
Crop demand	Tg Nr	3.27762	11.6437	12.7998	9.97861	9.39101	12.2232	25.9413	10.8575	13.0192
- Food	Tg Nr	2.08883	5.6064	7.1924	5.31077	4.89176	6.89979	14.4135	6.84512	6.4873
- Feed	Tg Nr	0.775498	4.57468	4.10868	3.22022	3.39757	3.38407	8.5632	2.2312	5.0304
- Seed	Tg Nr	0.0795852	0.382526	0.295827	0.424454	0.267209	0.588236	0.482381	0.550251	0.348668
- Material and waste	Tg Nr	0.333702	0.994858	1.20288	0.937948	0.834478	1.2517	2.48225	1.13154	1.15286
- Bioenergy	Tg Nr	0	0.0852124	0	0.0852124	0	0.0994145	0	0.0994145	0
Crop production	Tg Nr	1.97955	9.91772	7.52664	10.1466	6.94868	13.916	12.6522	11.817	9.47885
Crop Net-Exports	Tg Nr	-1.29807	-1.72595	-5.27314	0.167961	-2.44233	1.69281	-13.2891	0.959466	-3.54038
Livestock Sector
Total livestock demand	Tg DM	5.84827	33.6137	31.1536	31.0268	23.8273	45.8725	74.9006	26.5361	39.4958
- Food	Tg DM	5.02363	31.598	28.315	29.1368	21.7833	43.6972	69.6689	24.6641	36.9706
Livestock production	Tg DM	4.68283	16.3552	22.2442	15.0958	17.0174	13.5074	47.2474	7.80501	24.9211
Livestock Net-Exports	Tg DM	-1.16544	-17.2585	-8.90947	-15.931	-6.80988	-32.3651	-27.6532	-18.7311	-14.5747
Fooduse livestock demand	Tg Nr	0.264513	1.66375	1.49089	1.53416	1.14697	2.30082	3.66833	1.29866	1.94664
Total livestock demand	Tg Nr	0.304183	1.76198	1.62839	1.62625	1.24598	2.40701	3.92351	1.38982	2.06988
Livestock production	Tg Nr	0.245565	0.864126	1.17207	0.79753	0.897037	0.714355	2.49472	0.412038	1.31647
Livestock Net-Exports	Tg Nr	-0.0586184	-0.897849	-0.456323	-0.828724	-0.348941	-1.69266	-1.42879	-0.977782	-0.753419
Total Feed	Tg Nr	3.16123	8.21898	12.6577	7.58425	9.62865	6.19141	23.6535	3.63336	12.8078
Slaughtered Animals	Tg Nr	0.32482	1.16028	1.65431	1.07072	1.19813	0.961766	3.34321	0.552953	1.76568
Manure	Tg Nr	2.83641	7.0587	11.0034	6.51354	8.43053	5.22965	20.3103	3.08041	11.0422
Manure in confinement	Tg Nr	1.39089	4.85329	6.51632	4.47777	4.99493	3.98651	13.9476	2.35438	7.68799
- applied to cropland	Tg Nr	0.913674	3.15669	3.86593	2.5809	2.78318	2.63109	8.34133	1.30628	3.9946
- applied to pasture	Tg Nr	0	1.17335	0.77338	0.958689	0.555988	1.35541	3.09901	0.67293	1.47741
- lost	Tg Nr	0.477212	0.523254	1.87701	0.938174	1.65576	0	2.50726	0.375173	2.21597
Manure on pasture	Tg Nr	1.44552	2.2054	4.48709	2.03577	3.4356	1.24314	6.36266	0.726026	3.35418
- collected for fuel	Tg Nr	0.195011	0.137001	0.521314	0.195011	0.196521	0	0.395953	0	0.208531
feed per animal product	kg Nr / t DM	0.675067	0.502531	0.569036	0.502408	0.565812	0.458371	0.50063	0.465516	0.513935
manure per animal product	kg Nr / t DM	0.605703	0.431589	0.494665	0.43148	0.495406	0.387169	0.42987	0.39467	0.443085
Crop Residues
Crop Residues	Tg DM	99.4654	438.899	325.505	460.162	292.404	656.217	538.963	568.786	373.712
- used for feed	Tg DM	35.8048	35.6019	87.1441	32.9102	66.5387	14.3028	96.7188	14.155	67.3803
- recycled to soils	Tg DM	32.2432	330.379	166.031	350.457	160.675	556.795	352.756	480.491	244.1
- other uses	Tg DM	31.4174	72.9177	72.3294	76.7947	65.1904	85.1191	89.4888	74.14	62.2313
BG Crop Residues	Tg DM	46.7634	249.788	171.55	257.839	152.357	340.433	295.159	302.717	202.181
AG Crop Residues	Tg Nr	0.826239	3.66051	2.79552	3.80579	2.46505	5.27598	4.74326	4.59343	3.1893
- used for feed	Tg Nr	0.305079	0.324965	0.720097	0.299997	0.549203	0.163108	0.938654	0.169436	0.807006
- recycled to soils	Tg Nr	0.261613	2.73158	1.45896	2.87502	1.37018	4.4326	3.02462	3.82923	1.85567
- other uses	Tg Nr	0.259547	0.603965	0.616462	0.630773	0.545675	0.680278	0.779986	0.594765	0.52663
BG Crop Residues	Tg Nr	0.471313	2.09165	1.79443	2.16801	1.56282	2.84928	3.15224	2.50244	2.091
Conversion Byproducts
Conversion Byproduct Demand	Tg DM	11.525	10.9206	54.9227	27.9006	37.0927	14.6927	118.86	4.63731	49.9356
- used as feed	Tg DM	11.095	10.4906	54.4927	27.4706	36.6627	14.2627	118.43	4.20731	49.5056
Conversion Byproduct Production	Tg DM	8.99541	24.5158	31.1757	23.2064	21.2649	30.2742	62.7446	29.6206	28.3742
Conversion Byproduct Net-Exports	Tg DM	-2.52959	13.5952	-23.747	-4.69423	-15.8278	15.5815	-56.1155	24.9833	-21.5614
Conversion Byproduct Demand	Tg Nr	0.487308	0.603745	2.51392	1.55805	1.68363	1.04613	6.30096	0.305159	2.83564
- used as feed	Tg Nr	0.478355	0.594792	2.50497	1.5491	1.67468	1.03718	6.29201	0.296206	2.82669
Conversion Byproduct Production	Tg Nr	0.298898	0.819007	1.03829	0.775067	0.708936	1.01257	2.09283	0.985915	0.947977
Conversion Byproduct Net-Exports	Tg Nr	-0.18841	0.215262	-1.47563	-0.782981	-0.974698	-0.033559	-4.20813	0.680756	-1.88766
Other Nr inputs
Nr fixation crops	Tg Nr	0.319712	1.1112	1.56536	1.02779	1.22605	0.750253	3.1415	0.612723	1.72949
Nr fixation cropland area	Tg Nr	0.147815	0.186551	0.178331	0.189874	0.161434	0.216843	0.189934	0.20654	0.15258
Nr deposition on cropland	Tg Nr	0.228569	0.796026	0.740209	0.729809	0.565489	0.980001	1.25085	0.651327	0.717671
Soil organic matter loss	Tg Nr	0.318219	-0.00367552	-0.00233527	-0.00223442	-0.00356059	-0.00330231	-0.00275449	-0.00119845	-0.00356059
Inorganic Fertilizer	Tg Nr	2.54	14.6681	10.6107	14.025	8.15015	23.3982	12.2501	16.8624	9.30773
Cropland Soil Budgets
Total Nr withdrawals	Tg Nr	3.2771	15.6699	12.1166	16.1204	10.9765	22.0413	20.5477	18.9129	14.7591
Total Nr inputs	Tg Nr	5.2805	25.1207	20.5074	24.0186	16.0829	35.8432	31.8302	26.5199	20.1939
Nr uptake efficiency (NUpE)	share	0.620604	0.623785	0.590841	0.671162	0.682496	0.614937	0.64554	0.713156	0.730873
Crop uptake from soils	Tg Nr	2.8778	14.1762	10.2554	14.6681	9.48329	20.7028	16.9238	17.7499	12.681
inputs to cropland soils	Tg Nr	4.8812	23.6269	18.6462	22.5663	14.5897	34.5047	28.2063	25.357	18.1157
Soil Nr uptake efficiency (SNUpE)	share	0.589568	0.6	0.55	0.65	0.65	0.6	0.6	0.7	0.7
Losses	Tg Nr	2.0034	9.45077	8.39079	7.89822	5.10639	13.8019	11.2825	7.60709	5.43471
Nitrogen use efficiency (NUE)	kg Nr / tDM	54.7723	53.2191	56.406	49.4842	49.8751	56.1577	51.5885	45.7139	46.3596
inorganic fertilizer per harvest	kg Nr / tDM	26.3463	31.075	29.1849	28.8949	25.2746	36.6594	19.8543	29.0666	21.3681
manure per t harvest	kg Nr / tDM	9.47713	6.68757	10.6333	5.3173	8.63098	4.1223	13.5191	2.2517	9.17053
biologic fixation per t harvest	kg Nr / tDM	4.84945	2.74933	4.79605	2.5087	4.30274	1.51521	5.39938	1.41221	4.32073
manure per mineral fertilizer	ratio	0.359714	0.215208	0.364343	0.184022	0.341489	0.112449	0.680918	0.077467	0.42917
biological fixation per mineral fertilizer	ratio	0.184066	0.0884741	0.164333	0.0868216	0.17024	0.0413321	0.271951	0.0485853	0.202205
harvested N per capita	kg Nr / capita	6.93453	19.7125	13.7517	20.1674	14.053	20.1425	13.4535	17.1043	14.1468
fertilizer N per capita	kg Nr / capita	8.89784	29.1544	19.3865	27.8761	16.4829	33.8673	13.026	24.4071	13.8915
harvested N per food demand	Tg Nr / EJ	1.55998	3.99086	2.93544	4.22048	3.10524	3.63879	2.7324	3.3023	2.92034
fertilizer N per food demand	Tg Nr / EJ	2.00164	5.90239	4.13824	5.8337	3.64216	6.1182	2.64557	4.71224	2.86762
Nr withdrawals per ha	kg / ha	78.4417	338.459	262.501	350.514	238.427	472.841	404.766	445.548	312.052
Nr inputs per ha	kg / ha	126.396	542.589	444.284	522.25	349.345	768.926	627.019	624.756	426.958
Emissions
N2O emissions	Tg N2O-N	0.106311	0.382369	0.414758	0.369586	0.321077	0.479356	0.647745	0.352936	0.383681
N2O per capita	kg N2O-N / capita	0.372418	0.76	0.757794	0.734593	0.649346	0.693835	0.68877	0.510851	0.57263
N2O per food energy	kg N2O-N / EJ	0.0837785	0.153864	0.161759	0.15373	0.143484	0.125343	0.139888	0.0986291	0.118208

## Sheet: NAM
NAM		1995	2045				2095
			A1	A2	B1	B2	A1	A2	B1	B2
Population and GDP
Population	Million capita	292.082	359.041	369.614	359.041	357.696	415.821	444.451	415.821	383.661
GDP per capita	US$05 per capita	34424.4	50134.4	43236.9	50325.8	51083.5	72919.4	55095.7	65186	62469.4
Food demand
Food demand (after processing)	EJ	1.53586	2.03941	2.06953	2.00651	2.00157	2.54539	2.64828	2.40575	2.20847
Livestock demand (after processing)	EJ	0.437824	0.587289	0.55563	0.355466	0.367196	0.622508	0.602706	0.172274	0.1811
Livestock product share	share	0.285068	0.28797	0.268481	0.177157	0.183454	0.244562	0.227584	0.0716093	0.0820027
Food demand	kcal per capita per day	3443.19	3719.42	3666.39	3659.42	3664.13	4008.34	3901.71	3788.43	3769.29
Animal product demand	kcal per capita per day	981.545	1071.08	984.357	648.29	672.202	980.288	887.966	271.287	309.092
Cropland area and yields
Cropland Area	Million ha	236.628	245.9	246.067	228.14	228.18	245.331	246.256	199.89	228.367
Average yield	t DM / ha	2.52079	4.50204	4.03673	4.59574	3.51243	4.97776	5.57973	5.46653	3.68361
Average yield	kg Nr / ha	55.3249	82.2239	95.0884	82.4991	88.6186	84.2112	131.94	84.5505	92.0557
Harvested Crops
Crop demand	Tg DM	480.182	852.128	700.43	764.407	517.143	1431.71	995.23	1107.8	514.564
- Food	Tg DM	133.214	214.949	229.638	234.241	210.637	311.501	401.726	330.997	260.741
- Feed	Tg DM	306.803	261.263	399.536	158.384	246.692	674.783	477.301	344.545	184.959
- Seed	Tg DM	8.64549	19.7369	17.9939	18.3103	15.6248	19.4943	27.8123	15.8097	20.4843
- Material and waste	Tg DM	31.5191	51.208	53.262	48.5018	44.1888	70.1363	88.3905	60.645	48.3794
- Bioenergy	Tg DM	0	304.971	0	304.971	0	355.799	0	355.799	0
Crop production	Tg DM	596.488	1107.05	993.305	1048.47	801.468	1221.2	1374.04	1092.7	841.214
Crop Net-Exports	Tg DM	116.306	254.925	292.874	284.063	284.325	-210.515	378.814	-15.093	326.65
Crop demand	Tg Nr	9.70816	12.4957	14.6384	10.486	10.8142	25.7743	21.2895	18.6217	10.8504
- Food	Tg Nr	2.95848	4.77368	5.09991	5.20212	4.67792	6.91795	8.92171	7.35093	5.79064
- Feed	Tg Nr	5.73409	5.40288	7.70753	3.06376	4.57541	15.9983	9.40257	8.77556	3.31858
- Seed	Tg Nr	0.232849	0.468027	0.508304	0.436238	0.463487	0.440351	0.770158	0.313183	0.539781
- Material and waste	Tg Nr	0.782734	1.27168	1.32269	1.20447	1.09737	1.74174	2.19506	1.50603	1.20143
- Bioenergy	Tg Nr	0	0.579444	0	0.579444	0	0.676018	0	0.676018	0
Crop production	Tg Nr	13.0914	20.2189	23.3981	18.8213	20.221	20.6596	32.4909	16.9008	21.0225
Crop Net-Exports	Tg Nr	3.38325	7.72318	8.75967	8.3353	9.40683	-5.11475	11.2015	-1.72096	10.172
Livestock Sector
Total livestock demand	Tg DM	25.9714	43.6186	42.9667	26.7118	25.825	70.3125	62.3501	25.6588	14.0961
- Food	Tg DM	22.8848	38.6783	37.499	22.5044	21.6589	45.6165	53.6325	10.9849	10.0168
Livestock production	Tg DM	26.0231	26.5411	38.254	16.4334	24.3838	79.9351	49.3069	38.8931	21.3387
Livestock Net-Exports	Tg DM	0.0517121	-17.0775	-4.71277	-10.2784	-1.4412	9.62266	-13.0432	13.2343	7.24263
Fooduse livestock demand	Tg Nr	1.18697	2.00614	1.94497	1.16724	1.12339	2.366	2.78177	0.569755	0.519544
Total livestock demand	Tg Nr	1.34953	2.25791	2.22569	1.38287	1.33787	3.53698	3.22552	1.27268	0.729504
Livestock production	Tg Nr	1.35535	1.38	1.98939	0.855538	1.27924	4.02195	2.56294	1.95035	1.19556
Livestock Net-Exports	Tg Nr	0.00581134	-0.877909	-0.236292	-0.527335	-0.058627	0.484969	-0.662585	0.67767	0.466059
Total Feed	Tg Nr	12.1906	11.1435	16.7556	6.96084	10.4551	22.9967	20.9079	11.2218	6.85971
Slaughtered Animals	Tg Nr	1.8433	1.86673	2.69202	1.16224	1.75066	5.62809	3.46606	2.74495	1.74508
Manure	Tg Nr	10.3473	9.27682	14.0636	5.79861	8.70439	17.3686	17.4418	8.47685	5.11463
Manure in confinement	Tg Nr	7.94695	6.94978	10.6846	4.36855	6.66161	14.8041	13.1067	7.48712	4.13159
- applied to cropland	Tg Nr	3.79489	4.25202	5.32588	2.33893	3.09255	9.77071	7.23319	4.00611	1.94058
- applied to pasture	Tg Nr	0.567053	1.80499	1.63605	0.99288	0.949999	5.0334	3.0705	2.06375	0.823777
- lost	Tg Nr	3.585	0.892761	3.72271	1.03674	2.61906	0	2.80301	1.41726	1.36724
Manure on pasture	Tg Nr	2.40032	2.32705	3.37893	1.43005	2.04279	2.5645	4.33515	0.989727	0.983038
- collected for fuel	Tg Nr	0	0	0	0	0	0	0	0	0
feed per animal product	kg Nr / t DM	0.468451	0.419861	0.438009	0.423578	0.428771	0.287692	0.424036	0.288529	0.321468
manure per animal product	kg Nr / t DM	0.397618	0.349527	0.367637	0.352855	0.356974	0.217284	0.353741	0.217953	0.239688
Crop Residues
Crop Residues	Tg DM	653.444	1065.27	1112.87	1009.1	954.805	1155.3	1541.33	896.585	1032.59
- used for feed	Tg DM	48.4116	33.1939	61.5918	20.8136	37.7077	26.4553	70.7367	36.5753	21.4351
- recycled to soils	Tg DM	523.643	900.518	912.277	863.766	797.955	986.756	1277.24	749.897	881.904
- other uses	Tg DM	81.3894	131.554	139.001	124.522	119.143	142.086	193.355	110.113	129.249
BG Crop Residues	Tg DM	314	719.986	503.824	687.492	407.489	799.571	681.569	740.428	419.905
AG Crop Residues	Tg Nr	5.83154	9.62347	9.62432	9.10655	8.08832	10.5175	13.1217	8.59572	8.57295
- used for feed	Tg Nr	0.76722	0.433335	0.904227	0.271814	0.554726	0.348725	0.977033	0.6458	0.316502
- recycled to soils	Tg Nr	4.34251	8.00778	7.52479	7.71657	6.52921	8.88115	10.508	6.89977	7.18819
- other uses	Tg Nr	0.721809	1.18236	1.1953	1.11817	1.00439	1.28763	1.63673	1.05015	1.06826
BG Crop Residues	Tg Nr	3.06636	4.16342	4.71118	3.78706	3.71925	4.36315	6.24329	4.1828	3.80459
Conversion Byproducts
Conversion Byproduct Demand	Tg DM	43.9607	38.7235	112.1	31.2054	46.2623	34.5501	90.3683	1.6	34.3987
- used as feed	Tg DM	42.3607	37.1235	110.5	29.6054	44.6623	32.9501	88.7683	0	32.7987
Conversion Byproduct Production	Tg DM	49.6322	80.2176	85.1497	84.6396	76.3292	114.701	147.14	116.6	92.0813
Conversion Byproduct Net-Exports	Tg DM	5.67153	41.4941	-26.9501	53.4342	30.0669	80.1506	56.7713	115	57.6826
Conversion Byproduct Demand	Tg Nr	2.77226	2.30484	3.80913	1.78393	2.70396	2.39768	4.91656	0.02176	1.92631
- used as feed	Tg Nr	2.7505	2.28308	3.78737	1.76217	2.6822	2.37592	4.8948	0	1.90455
Conversion Byproduct Production	Tg Nr	3.11835	5.04002	5.34984	5.31758	4.79549	7.20641	9.2444	7.32521	5.7849
Conversion Byproduct Net-Exports	Tg Nr	0.346084	2.73518	1.54071	3.53365	2.09153	4.80874	4.32785	7.30345	3.85859
Other Nr inputs
Nr fixation crops	Tg Nr	4.99653	7.44933	8.41837	6.74918	7.62112	6.72891	10.7394	6.15742	7.57729
Nr fixation cropland area	Tg Nr	0.836136	0.859534	0.889708	0.801144	0.828562	0.866652	0.915405	0.698221	0.839435
Nr deposition on cropland	Tg Nr	1.95613	3.18391	4.02489	2.33038	2.4736	4.30566	5.26855	2.25034	2.11375
Soil organic matter loss	Tg Nr	4.09368	0.0376822	0.00470252	-0.00119713	-0.00119713	-0.00116224	-0.00119435	1.19511e-12	-0.00119713
Inorganic Fertilizer	Tg Nr	12.56	22.9764	29.8951	20.7648	20.1949	19.0988	37.0768	15.118	20.2331
Cropland Soil Budgets
Total Nr withdrawals	Tg Nr	21.9893	34.0058	37.7336	31.7149	32.0286	35.5403	51.8559	29.6793	33.4
Total Nr inputs	Tg Nr	35.8791	51.3981	61.3029	44.9231	44.9215	54.4543	78.7535	39.6259	44.2356
Nr uptake efficiency (NUpE)	share	0.612873	0.661616	0.615527	0.705982	0.71299	0.652663	0.658459	0.748988	0.755049
Crop uptake from soils	Tg Nr	16.7599	26.0884	28.8069	24.5295	23.944	28.371	40.3464	23.2087	25.2829
inputs to cropland soils	Tg Nr	30.6497	43.4807	52.3762	37.7377	36.8369	47.285	67.244	33.1553	36.1185
Soil Nr uptake efficiency (SNUpE)	share	0.546822	0.6	0.55	0.65	0.65	0.6	0.6	0.7	0.7
Losses	Tg Nr	13.8898	17.3923	23.5693	13.2082	12.8929	18.914	26.8976	9.94658	10.8355
Nitrogen use efficiency (NUE)	kg Nr / tDM	60.1506	46.4278	61.7161	42.8464	56.0491	44.5908	57.3151	36.2641	52.5854
inorganic fertilizer per harvest	kg Nr / tDM	21.0566	20.7545	30.0966	19.8049	25.1974	15.6394	26.9837	13.8354	24.0523
manure per t harvest	kg Nr / tDM	6.36207	3.84085	5.36178	2.2308	3.85861	8.00092	5.26416	3.66624	2.30688
biologic fixation per t harvest	kg Nr / tDM	9.77835	7.50539	9.37082	7.20128	10.5428	6.21976	8.48212	6.27403	10.0055
manure per mineral fertilizer	ratio	0.302141	0.185061	0.178152	0.112639	0.153135	0.511587	0.195087	0.264989	0.0959108
biological fixation per mineral fertilizer	ratio	0.464384	0.361626	0.311358	0.363611	0.418406	0.397698	0.314342	0.453475	0.415987
harvested N per capita	kg Nr / capita	44.821	56.3136	63.3041	52.4211	56.5312	49.6839	73.1035	40.6444	54.7944
fertilizer N per capita	kg Nr / capita	43.0017	63.9937	80.8819	57.8341	56.4583	45.9304	83.4215	36.3571	52.7371
harvested N per food demand	Tg Nr / EJ	8.52385	9.9141	11.306	9.38014	10.1026	8.11646	12.2687	7.02516	9.51901
fertilizer N per food demand	Tg Nr / EJ	8.17785	11.2662	14.4453	10.3487	10.0896	7.50328	14.0003	6.28413	9.1616
Nr withdrawals per ha	kg / ha	92.9279	138.291	153.347	139.015	140.365	144.867	210.577	148.478	146.256
Nr inputs per ha	kg / ha	151.627	209.02	249.131	196.911	196.868	221.963	319.803	198.239	193.704
Emissions
N2O emissions	Tg N2O-N	0.556105	0.624636	0.868656	0.525222	0.588956	0.675381	1.05182	0.459454	0.496972
N2O per capita	kg N2O-N / capita	1.90394	1.73973	2.35017	1.46285	1.64652	1.62421	2.36657	1.10493	1.29534
N2O per food energy	kg N2O-N / EJ	0.362082	0.306283	0.419735	0.261759	0.294247	0.265335	0.397172	0.190982	0.22503

## Sheet: PAO
PAO		1995	2045				2095
			A1	A2	B1	B2	A1	A2	B1	B2
Population and GDP
Population	Million capita	147.285	159.042	161.271	159.042	151.912	158.777	164.185	158.777	142.666
GDP per capita	US$05 per capita	31935.1	45259.8	41080.3	51778	44898.5	67176.8	51724.9	70119.2	53365.2
Food demand
Food demand (after processing)	EJ	0.639035	0.774783	0.778421	0.772533	0.725575	0.865002	0.871987	0.829561	0.720381
Livestock demand (after processing)	EJ	0.151365	0.205368	0.193482	0.122103	0.138617	0.2083	0.195381	0.0622035	0.0929134
Livestock product share	share	0.236865	0.265065	0.248557	0.158055	0.191045	0.240809	0.224064	0.0749837	0.128978
Food demand	kcal per capita per day	2841.08	3189.96	3160.64	3180.69	3127.55	3567.34	3477.69	3421.18	3306.4
Animal product demand	kcal per capita per day	672.952	845.545	785.598	502.726	597.502	859.047	779.226	256.533	426.454
Cropland area and yields
Cropland Area	Million ha	26.5629	86.6433	68.3974	72.6281	57.4012	81.216	88.772	30.4396	67.9603
Average yield	t DM / ha	4.23185	13.3805	7.72103	11.5197	6.02134	13.9274	14.4284	20.0927	6.61908
Average yield	kg Nr / ha	78.4651	200.438	152.036	151.462	113.824	220.068	285.915	233.185	129.41
Harvested Crops
Crop demand	Tg DM	118.793	471.975	188.76	437.672	135.36	500.215	254.192	444.596	77.3177
- Food	Tg DM	42.9848	55.8947	57.5685	61.4469	51.4838	63.545	79.2697	67.3687	32.6278
- Feed	Tg DM	68.3485	90.6277	115.295	53.8065	71.8838	57.0935	147.465	13.7292	33.9879
- Seed	Tg DM	1.11842	12.3093	7.26786	9.56443	4.78227	14.3175	15.92	6.50268	6.45351
- Material and waste	Tg DM	6.34141	8.57245	8.62933	8.24366	7.20982	9.45947	11.5377	8.23042	4.24843
- Bioenergy	Tg DM	0	304.571	0	304.61	0	355.799	0	348.765	0
Crop production	Tg DM	112.41	1159.33	528.099	836.652	345.632	1131.13	1280.84	611.613	449.835
Crop Net-Exports	Tg DM	-6.38298	687.355	339.339	398.98	210.272	630.912	1026.64	167.018	372.517
Crop demand	Tg Nr	2.36311	4.26724	4.16442	3.40996	2.86266	3.79504	5.81425	2.6489	1.70226
- Food	Tg Nr	0.839976	1.09225	1.12496	1.20075	1.00606	1.24175	1.54903	1.31647	0.637588
- Feed	Tg Nr	1.35045	2.16447	2.66362	1.28173	1.57782	1.38402	3.62603	0.302897	0.819752
- Seed	Tg Nr	0.0250155	0.22642	0.174899	0.151536	0.110897	0.272979	0.370524	0.0732323	0.145993
- Material and waste	Tg Nr	0.147667	0.199619	0.200943	0.191963	0.167888	0.220274	0.268667	0.191654	0.0989294
- Bioenergy	Tg Nr	0	0.58448	0	0.583984	0	0.676018	0	0.764653	0
Crop production	Tg Nr	2.08426	17.3666	10.3989	11.0004	6.53364	17.8731	25.3813	7.09804	8.79474
Crop Net-Exports	Tg Nr	-0.278847	13.0994	6.23445	7.59042	3.67098	14.078	19.567	4.44914	7.09247
Livestock Sector
Total livestock demand	Tg DM	6.48829	10.6396	10.1094	5.66571	6.08059	10.7513	12.8316	2.12654	1.31289
- Food	Tg DM	5.39325	9.28343	8.62362	4.50252	4.94666	9.40908	10.9449	1.0938	0.753759
Livestock production	Tg DM	6.6658	7.93365	10.7649	4.88535	7.39267	4.99668	13.6598	1.58658	3.75123
Livestock Net-Exports	Tg DM	0.177516	-2.70592	0.655506	-0.780354	1.31208	-5.75466	0.82826	-0.539957	2.43834
Fooduse livestock demand	Tg Nr	0.282949	0.487042	0.452425	0.236218	0.259519	0.493634	0.574209	0.0573845	0.0395448
Total livestock demand	Tg Nr	0.336568	0.553609	0.525202	0.293485	0.315181	0.559713	0.666741	0.108409	0.0671258
Livestock production	Tg Nr	0.341457	0.402328	0.546221	0.245015	0.37135	0.253271	0.688277	0.0778852	0.18161
Livestock Net-Exports	Tg Nr	0.00488898	-0.151281	0.0210191	-0.0484702	0.0561689	-0.306442	0.0215359	-0.030524	0.114484
Total Feed	Tg Nr	4.49036	3.67884	5.72979	2.26832	3.86923	2.11382	6.31942	0.690386	1.70468
Slaughtered Animals	Tg Nr	0.438194	0.509272	0.691449	0.306137	0.463459	0.321259	0.863867	0.0950826	0.215762
Manure	Tg Nr	4.05217	3.16957	5.03834	1.96218	3.40577	1.79256	5.45555	0.595303	1.48892
Manure in confinement	Tg Nr	1.72263	1.93815	2.56887	1.15549	1.67173	1.26068	3.2617	0.382366	0.766007
- applied to cropland	Tg Nr	0.881476	1.22387	1.35321	0.63822	0.822819	0.832051	1.85211	0.208815	0.377505
- applied to pasture	Tg Nr	0	0.457268	0.277163	0.238456	0.168529	0.428632	0.691999	0.107571	0.141046
- lost	Tg Nr	0.841159	0.257015	0.938497	0.278819	0.68038	0	0.717583	0.0659803	0.247455
Manure on pasture	Tg Nr	2.32953	1.23142	2.46947	0.806686	1.73404	0.531874	2.19385	0.212937	0.722916
- collected for fuel	Tg Nr	0	0	0	0	0	0	0	0	0
feed per animal product	kg Nr / t DM	0.673642	0.4637	0.532266	0.46431	0.523387	0.423044	0.462627	0.43514	0.454434
manure per animal product	kg Nr / t DM	0.607904	0.399509	0.468034	0.401645	0.460695	0.358749	0.399386	0.375211	0.396916
Crop Residues
Crop Residues	Tg DM	89.3985	1013.49	557.732	677.766	391.637	946.104	1342.64	322.541	527.798
- used for feed	Tg DM	5.42767	6.73381	6.43379	4.18683	4.40544	5.22578	11.5947	1.28594	3.15995
- recycled to soils	Tg DM	72.6585	881.916	481.587	589.872	338.561	823.159	1163.37	280.807	459.197
- other uses	Tg DM	11.3123	124.844	69.7114	83.7071	48.6701	117.719	167.68	40.4482	65.4403
BG Crop Residues	Tg DM	55.5213	703.966	244.68	550.217	160.566	713.894	576.611	460.864	201.01
AG Crop Residues	Tg Nr	0.843283	8.80005	4.63345	5.83561	3.12333	7.95164	10.8866	3.24299	3.98646
- used for feed	Tg Nr	0.091075	0.0669943	0.0624525	0.0416129	0.0426009	0.0524912	0.11528	0.0277446	0.0312907
- recycled to soils	Tg Nr	0.646689	7.65319	3.99438	5.07615	2.69354	6.91397	9.41634	2.81325	3.46122
- other uses	Tg Nr	0.10552	1.07987	0.576611	0.717847	0.387185	0.985179	1.35495	0.401997	0.493949
BG Crop Residues	Tg Nr	0.648707	3.71596	2.23743	2.56153	1.48481	3.54977	4.93204	1.57111	1.73289
Conversion Byproducts
Conversion Byproduct Demand	Tg DM	11.8328	0.953773	3.9669	0.88	20.5211	0.88	0.88	1.81804	35.4917
- used as feed	Tg DM	10.9528	0.0737732	3.0869	0	19.6411	0	0	0.938039	34.6117
Conversion Byproduct Production	Tg DM	9.85528	12.889	13.2298	13.9023	11.7167	14.5884	18.139	15.0594	7.35287
Conversion Byproduct Net-Exports	Tg DM	-1.97755	11.9353	9.26291	13.0223	-8.80443	13.7084	17.259	13.2414	-28.1388
Conversion Byproduct Demand	Tg Nr	0.608249	0.017777	0.293217	0.017777	0.351242	0.017777	0.0226044	0.112697	0.0318735
- used as feed	Tg Nr	0.590472	0	0.27544	0	0.333465	0	0.00482741	0.0949202	0.0140965
Conversion Byproduct Production	Tg Nr	0.477537	0.624947	0.641221	0.672608	0.567248	0.706987	0.878728	0.727562	0.355575
Conversion Byproduct Net-Exports	Tg Nr	-0.130712	0.60717	0.348004	0.654831	0.216007	0.68921	0.856124	0.614865	0.323701
Other Nr inputs
Nr fixation crops	Tg Nr	0.890229	1.89985	1.88603	0.933923	1.2649	2.39828	2.5336	0.239844	1.07483
Nr fixation cropland area	Tg Nr	0.12944	0.719874	0.538435	0.843714	0.590704	0.651744	0.773114	0.159268	0.803815
Nr deposition on cropland	Tg Nr	0.0800002	0.306402	0.21354	0.190449	0.126247	0.286143	0.45541	0.109355	0.128367
Soil organic matter loss	Tg Nr	0.717217	0.114526	1.37033	0.0261458	0.404881	0.0236462	0.0261872	0.0118408	0.344828
Inorganic Fertilizer	Tg Nr	1.39	32.5267	17.9451	18.8362	8.90159	32.248	46.371	11.6965	12.1417
Cropland Soil Budgets
Total Nr withdrawals	Tg Nr	3.57625	29.8826	17.2697	19.3975	11.1418	29.3745	41.1999	11.9121	14.5141
Total Nr inputs	Tg Nr	5.40877	48.3868	29.7133	29.2579	16.4004	47.1766	66.7304	16.8832	20.2112
Nr uptake efficiency (NUpE)	share	0.661194	0.617577	0.581212	0.662985	0.679361	0.622649	0.617408	0.705563	0.718121
Crop uptake from soils	Tg Nr	2.661	27.7563	15.2088	18.3121	9.76599	26.7032	38.2958	11.5991	13.2933
inputs to cropland soils	Tg Nr	4.49353	46.2606	27.6524	28.1724	15.0246	44.5054	63.8263	16.5701	18.9904
Soil Nr uptake efficiency (SNUpE)	share	0.592186	0.6	0.55	0.65	0.65	0.6	0.6	0.7	0.7
Losses	Tg Nr	1.83252	18.5042	12.4436	9.86034	5.25861	17.8021	25.5305	4.97103	5.69711
Nitrogen use efficiency (NUE)	kg Nr / tDM	48.1164	41.7369	56.2647	34.9702	47.4504	41.7076	52.0991	27.6043	44.9303
inorganic fertilizer per harvest	kg Nr / tDM	12.3654	28.0565	33.9805	22.5138	25.7545	28.5097	36.2038	19.1239	26.9916
manure per t harvest	kg Nr / tDM	7.84161	1.05567	2.56242	0.762825	2.38062	0.735595	1.44602	0.341416	0.839209
biologic fixation per t harvest	kg Nr / tDM	9.07097	2.25969	4.59093	2.1247	5.36871	2.69645	2.58169	0.652557	4.1763
manure per mineral fertilizer	ratio	0.634156	0.0376264	0.0754085	0.0338826	0.0924351	0.0258016	0.0399412	0.0178528	0.0310915
biological fixation per mineral fertilizer	ratio	0.733575	0.0805408	0.135105	0.0943734	0.208457	0.0945802	0.07131	0.0341225	0.154726
harvested N per capita	kg Nr / capita	14.1512	109.195	64.4809	69.1667	43.0093	112.567	154.589	44.7044	61.6455
fertilizer N per capita	kg Nr / capita	9.4375	204.517	111.273	118.436	58.5969	203.103	282.431	73.6659	85.1058
harvested N per food demand	Tg Nr / EJ	3.26157	22.4148	13.3589	14.2394	9.00478	20.6625	29.1074	8.55638	12.2085
fertilizer N per food demand	Tg Nr / EJ	2.17515	41.9817	23.0532	24.3824	12.2683	37.2809	53.1786	14.0996	16.8546
Nr withdrawals per ha	kg / ha	134.633	344.892	252.491	267.08	194.104	361.683	464.109	391.337	213.567
Nr inputs per ha	kg / ha	203.622	558.46	434.422	402.845	285.715	580.878	751.705	554.645	297.397
Emissions
N2O emissions	Tg N2O-N	0.138555	0.631613	0.444368	0.381637	0.249953	0.583751	0.903565	0.219148	0.258902
N2O per capita	kg N2O-N / capita	0.940731	3.97137	2.75542	2.3996	1.64537	3.67654	5.50332	1.38022	1.81474
N2O per food energy	kg N2O-N / EJ	0.216819	0.815212	0.570859	0.494007	0.344489	0.674855	1.03621	0.264173	0.359396

## Sheet: PAS
PAS		1995	2045				2095
			A1	A2	B1	B2	A1	A2	B1	B2
Population and GDP
Population	Million capita	403.22	538.759	591.155	538.759	556.716	613.414	782.719	613.414	652.214
GDP per capita	US$05 per capita	2614.71	9649.4	4793.28	8694.31	11438.1	34710.9	9063.79	21371.6	21796.5
Food demand
Food demand (after processing)	EJ	1.4826	2.38398	2.43704	2.3128	2.46179	3.23859	3.60974	2.93465	3.13352
Livestock demand (after processing)	EJ	0.139941	0.506941	0.368029	0.438735	0.469318	0.782656	0.635312	0.523237	0.602142
Livestock product share	share	0.0943894	0.212645	0.151015	0.189699	0.190641	0.241666	0.175999	0.178296	0.192162
Food demand	kcal per capita per day	2407.66	2897.5	2699.46	2810.99	2895.57	3457.15	3019.85	3132.69	3145.99
Animal product demand	kcal per capita per day	227.258	616.139	407.658	533.241	552.013	835.474	531.492	558.548	604.539
Cropland area and yields
Cropland Area	Million ha	66.9278	87.1856	92.32	83.712	77.2955	68.194	138.093	37.5518	70.8996
Average yield	t DM / ha	2.84123	6.6432	4.52828	6.59371	4.77018	8.62961	4.70907	12.2296	5.11835
Average yield	kg Nr / ha	37.6503	63.1322	62.8343	60.9326	69.1829	67.1213	69.2227	71.7672	80.6354
Harvested Crops
Crop demand	Tg DM	204.43	756.076	523.482	702.114	467.304	736.966	840.458	631.037	517.759
- Food	Tg DM	137.152	247.48	297.523	230.999	240.678	236.684	458.068	204.422	255.131
- Feed	Tg DM	37.1337	174.551	156.481	143.155	167.846	122.036	272.308	61.6345	199.701
- Seed	Tg DM	1.86601	6.31828	4.17812	6.06316	3.7419	6.24847	6.73603	4.76639	4.20882
- Material and waste	Tg DM	28.2784	58.6351	65.2998	52.8043	55.0371	58.0575	103.346	46.2733	58.7179
- Bioenergy	Tg DM	0	269.092	0	269.092	0	313.94	0	313.94	0
Crop production	Tg DM	190.157	579.192	418.05	551.973	368.714	588.488	650.292	459.245	362.889
Crop Net-Exports	Tg DM	-14.2727	-176.885	-105.431	-150.141	-98.5897	-148.479	-190.166	-171.792	-154.87
Crop demand	Tg Nr	3.04526	9.18365	8.03791	8.3343	7.51298	7.85612	13.0261	5.50404	9.31377
- Food	Tg Nr	2.00865	3.62446	4.35736	3.38309	3.52485	3.46635	6.70862	2.99386	3.73651
- Feed	Tg Nr	0.65392	4.23301	2.79632	3.70216	3.23484	2.99793	4.90267	1.29994	4.7552
- Seed	Tg Nr	0.0280628	0.079593	0.0653352	0.0755765	0.0630989	0.0672753	0.118769	0.033469	0.0856965
- Material and waste	Tg Nr	0.354628	0.735318	0.818897	0.662196	0.690196	0.728075	1.29602	0.580294	0.736356
- Bioenergy	Tg Nr	0	0.511274	0	0.511274	0	0.596487	0	0.596487	0
Crop production	Tg Nr	2.51985	5.50421	5.80086	5.10079	5.34753	4.57727	9.5592	2.69499	5.71702
Crop Net-Exports	Tg Nr	-0.525415	-3.67944	-2.23706	-3.23351	-2.16545	-3.27885	-3.46688	-2.80906	-3.59675
Livestock Sector
Total livestock demand	Tg DM	5.86584	32.2783	25.7331	24.9149	26.3933	35.3208	48.4519	20.2319	29.2953
- Food	Tg DM	5.22913	29.5762	23.0773	22.7388	23.8121	33.1023	43.376	18.8041	26.2711
Livestock production	Tg DM	4.97576	16.4861	19.2447	12.7221	19.7529	10.9882	31.8677	6.28335	19.2759
Livestock Net-Exports	Tg DM	-0.890081	-15.7922	-6.48842	-12.1928	-6.64033	-24.3326	-16.5842	-13.9485	-10.0194
Fooduse livestock demand	Tg Nr	0.280874	1.58864	1.23956	1.22138	1.27903	1.77803	2.32987	1.01003	1.41111
Total livestock demand	Tg Nr	0.312879	1.72092	1.37055	1.32803	1.4062	1.88653	2.57832	1.08007	1.55908
Livestock production	Tg Nr	0.270573	0.895864	1.04527	0.691288	1.07301	0.597673	1.73001	0.34168	1.0465
Livestock Net-Exports	Tg Nr	-0.042306	-0.825057	-0.32528	-0.636742	-0.333193	-1.28886	-0.848317	-0.738389	-0.512577
Total Feed	Tg Nr	3.46348	7.48679	10.2308	5.94228	10.2117	4.848	14.0866	2.58364	8.13792
Slaughtered Animals	Tg Nr	0.377194	1.25348	1.57443	0.967029	1.49719	0.838844	2.41386	0.479269	1.46038
Manure	Tg Nr	3.08628	6.2333	8.65632	4.97525	8.71451	4.00916	11.6728	2.10437	6.67755
Manure in confinement	Tg Nr	1.76285	4.9753	5.80108	4.00511	5.7776	3.72143	9.23869	1.93847	5.20531
- applied to cropland	Tg Nr	1.08054	3.18754	3.24597	2.26134	3.00775	2.45614	5.3464	1.06007	2.58074
- applied to pasture	Tg Nr	0	1.16942	0.640979	0.825125	0.596262	1.26528	1.96218	0.546096	0.950018
- lost	Tg Nr	0.682311	0.61834	1.91413	0.918647	2.17359	0	1.93011	0.332307	1.67455
Manure on pasture	Tg Nr	1.32343	1.258	2.85523	0.970139	2.93692	0.287733	2.43406	0.1659	1.47224
- collected for fuel	Tg Nr	0.101714	0.0087082	0.0554877	0.101714	0.10249	0	0.0178333	0	0.0107561
feed per animal product	kg Nr / t DM	0.69607	0.454126	0.531614	0.467083	0.516972	0.441199	0.442034	0.411188	0.42218
manure per animal product	kg Nr / t DM	0.620263	0.378094	0.449803	0.391071	0.441176	0.364859	0.366288	0.334913	0.346419
Crop Residues
Crop Residues	Tg DM	257.614	465.603	487.27	435.718	418.783	410.8	751.664	261.536	418.063
- used for feed	Tg DM	32.9239	128.928	96.1436	119.949	74.7508	159.324	210.347	64.4727	74.3893
- recycled to soils	Tg DM	147.381	264.004	288.733	247.765	256.03	202.163	423.872	165.666	278.403
- other uses	Tg DM	77.3091	72.6714	102.394	68.0033	88.0021	49.3133	117.445	31.3965	65.2712
BG Crop Residues	Tg DM	81.4202	409.674	171.033	397.668	151.919	429.086	266.217	386.265	145.794
AG Crop Residues	Tg Nr	1.9333	4.24567	3.76812	3.99424	3.28942	3.90066	5.82162	2.73818	3.28583
- used for feed	Tg Nr	0.321493	1.15227	0.931898	1.0584	0.77266	1.32069	1.89335	0.568339	0.760914
- recycled to soils	Tg Nr	1.03164	2.43079	2.04442	2.3125	1.82555	2.11176	3.01872	1.84117	2.01193
- other uses	Tg Nr	0.580175	0.662601	0.791804	0.623333	0.691204	0.468206	0.909547	0.328672	0.512984
BG Crop Residues	Tg Nr	0.738102	1.63155	1.57839	1.51142	1.41886	1.40533	2.36129	1.08609	1.31917
Conversion Byproducts
Conversion Byproduct Demand	Tg DM	25.469	21.0286	74.5324	8.78322	59.7046	20.5807	94.8711	23.0971	19.1082
- used as feed	Tg DM	21.559	17.1186	70.6224	4.87322	55.7946	16.6707	90.9611	19.1871	15.1982
Conversion Byproduct Production	Tg DM	23.2769	42.9322	50.9784	39.8376	41.5093	41.3017	78.8303	35.1984	44.0479
Conversion Byproduct Net-Exports	Tg DM	-2.19209	21.9037	-23.5541	31.0543	-18.1954	20.721	-16.0407	12.1013	24.9397
Conversion Byproduct Demand	Tg Nr	1.1455	0.635911	3.27806	0.066593	3.00619	0.123073	4.39173	0.510135	0.89479
- used as feed	Tg Nr	1.07891	0.569318	3.21146	0	2.9396	0.0564798	4.32513	0.443542	0.828197
Conversion Byproduct Production	Tg Nr	0.892179	1.65268	1.95765	1.53178	1.59608	1.59172	3.02983	1.35298	1.69404
Conversion Byproduct Net-Exports	Tg Nr	-0.253322	1.01677	-1.3204	1.46519	-1.41011	1.46865	-1.3619	0.842848	0.799247
Other Nr inputs
Nr fixation crops	Tg Nr	0.492989	1.09092	1.21542	0.985271	1.28909	0.802183	1.99596	0.257957	1.51164
Nr fixation cropland area	Tg Nr	1.29374	1.14673	1.71111	1.07146	1.36051	0.674988	2.0856	0.413057	1.18374
Nr deposition on cropland	Tg Nr	0.435211	0.709188	0.827649	0.501637	0.738748	0.671955	1.15202	0.328819	0.62841
Soil organic matter loss	Tg Nr	2.39447	2.67414	2.64712	3.52977	0.835776	0.0897514	4.6709	0.0896651	0.0896651
Inorganic Fertilizer	Tg Nr	3.94	5.23826	5.88463	3.4974	4.20299	7.61306	7.41071	4.07803	4.65019
Cropland Soil Budgets
Total Nr withdrawals	Tg Nr	5.19126	11.3814	11.1474	10.6064	10.0558	9.88325	17.7421	6.51926	10.322
Total Nr inputs	Tg Nr	11.4348	18.1887	19.2201	15.7464	14.7424	15.8924	28.1604	9.18833	14.0612
Nr uptake efficiency (NUpE)	share	0.453989	0.625741	0.579986	0.67358	0.682102	0.621884	0.630038	0.709515	0.73408
Crop uptake from soils	Tg Nr	4.6702	10.2109	9.86661	9.5456	8.70362	9.01379	15.6274	6.22783	8.72469
inputs to cropland soils	Tg Nr	10.9137	17.0182	17.9393	14.6855	13.3902	15.023	26.0456	8.8969	12.4638
Soil Nr uptake efficiency (SNUpE)	share	0.427921	0.6	0.55	0.65	0.65	0.6	0.6	0.7	0.7
Losses	Tg Nr	6.2435	6.80728	8.07268	5.13994	4.68657	6.00919	10.4183	2.66907	3.73915
Nitrogen use efficiency (NUE)	kg Nr / tDM	60.1331	31.4036	45.9755	28.5275	39.9832	27.0056	43.3042	20.0075	38.7479
inorganic fertilizer per harvest	kg Nr / tDM	20.7197	9.04409	14.0764	6.33619	11.3991	12.9367	11.396	8.87987	12.8144
manure per t harvest	kg Nr / tDM	5.68235	5.50342	7.76455	4.09684	8.15739	4.17365	8.22153	2.30829	7.11165
biologic fixation per t harvest	kg Nr / tDM	9.39607	3.86341	7.00044	3.72615	7.18606	2.51011	6.2765	1.46112	7.42754
manure per mineral fertilizer	ratio	0.274249	0.60851	0.551602	0.646578	0.71562	0.322622	0.721442	0.259946	0.554975
biological fixation per mineral fertilizer	ratio	0.453485	0.427174	0.497318	0.588075	0.630408	0.194031	0.550765	0.164543	0.579627
harvested N per capita	kg Nr / capita	6.24931	10.2165	9.81275	9.46767	9.6055	7.46195	12.2128	4.39343	8.76556
fertilizer N per capita	kg Nr / capita	9.77133	9.72283	9.95447	6.49159	7.54962	12.411	9.4679	6.6481	7.12985
harvested N per food demand	Tg Nr / EJ	1.69962	2.30884	2.38029	2.20546	2.17221	1.41335	2.64817	0.918334	1.82447
fertilizer N per food demand	Tg Nr / EJ	2.6575	2.19728	2.41466	1.5122	1.70729	2.35073	2.05297	1.38962	1.48401
Nr withdrawals per ha	kg / ha	77.565	130.543	120.747	126.702	130.096	144.928	128.479	173.607	145.586
Nr inputs per ha	kg / ha	170.852	208.621	208.19	188.102	190.727	233.048	203.922	244.684	198.325
Emissions
N2O emissions	Tg N2O-N	0.1733	0.260037	0.340789	0.22282	0.291326	0.203481	0.441596	0.122882	0.224798
N2O per capita	kg N2O-N / capita	0.429789	0.482659	0.576481	0.413579	0.523293	0.331718	0.564181	0.200325	0.344669
N2O per food energy	kg N2O-N / EJ	0.116889	0.109077	0.139837	0.096342	0.118339	0.06283	0.122334	0.0418729	0.0717397

[truncated: 1 more sheets: SAS]
